# Supplementary material for: Gene-Set Local Hierarchical Clustering (GSLHC)—A Gene Set-Based Approach for Characterizing Bioactive Compounds in Terms of Biological Functional Groups
Source: PLoS One. 2015 Oct 16;10(10):e0139889. doi: 10.1371/journal.pone.0139889 (PMC4652590; doi:10.1371/journal.pone.0139889)
Supplement: S2 Table — tGSCMap1 is the 300 by 671 similarity matrix of the 300 largest ES variance MSigDB tags and the 671 instances in CMap v1.0 (http://figshare.com/download/file/2258032). (XLSX) [file pone.0139889.s022.xlsx]

## Sheet: msigdb_m_sel
	tetraethylenepentamine_1e-04M_6hr_MCF7	dehydrocholic acid_9.6e-06M_6hr_PC3	colchicine_1e-07M_6hr_MCF7	tioguanine_1e-05M_6hr_MCF7	W-13_1e-05M_6hr_MCF7	monastrol_1e-04M_6hr_MCF7	NU-1025_1e-04M_6hr_MCF7	dihydrostreptomycin_2.8e-06M_6hr_HL60	thiamine_1.18e-05M_6hr_HL60	praziquantel_1.28e-05M_6hr_HL60	mebeverine_8.6e-06M_6hr_HL60	vinpocetine_1.14e-05M_6hr_HL60	piroxicam_1.2e-05M_6hr_HL60	erythromycin_5.4e-06M_6hr_HL60	chloroquine_7.8e-06M_6hr_HL60	cimetidine_1.58e-05M_6hr_HL60	nimesulide_1.3e-05M_6hr_HL60	methapyrilene_1.34e-05M_6hr_HL60	benserazide_1e-05M_6hr_SKMEL5	novobiocin_1e-04M_6hr_SKMEL5	flufenamic acid_1e-05M_6hr_MCF7	15-delta prostaglandin J2_1e-05M_6hr_PC3	pirinixic acid_1e-04M_6hr_PC3	streptomycin_2.8e-06M_6hr_HL60	benzydamine_1.16e-05M_6hr_HL60	cinnarizine_1.08e-05M_6hr_HL60	hemicholinium_7e-06M_6hr_HL60	midecamycin_5e-06M_6hr_HL60	pirenzepine_9.4e-06M_6hr_HL60	meclofenamic acid_1.18e-05M_6hr_HL60	pentetrazol_2.9e-05M_6hr_HL60	hyoscyamine_1.38e-05M_6hr_HL60	pyrantel_1.12e-05M_6hr_HL60	oxolinic acid_1.54e-05M_6hr_HL60	pyridoxine_1.94e-05M_6hr_HL60	antazoline_1.32e-05M_6hr_HL60	dipivefrine_1.04e-05M_6hr_HL60	naloxone_1.1e-05M_6hr_HL60	iobenguane_1.08e-05M_6hr_HL60	mesoridazine_7.4e-06M_6hr_HL60	thiocolchicoside_7e-06M_6hr_HL60	tamoxifen_1e-06M_6hr_MCF7	monastrol_1e-04M_6hr_MCF7.1	diclofenac_1e-05M_6hr_MCF7	LY-294002_1e-05M_6hr_MCF7	mercaptopurine_1e-04M_6hr_MCF7	monastrol_1e-04M_6hr_MCF7.2	loperamide_7.8e-06M_6hr_PC3	disulfiram_1.34e-05M_6hr_HL60
CMV_HCMV_TIMECOURSE_ALL	0	0	0	0	-0.458383	0	0	0	0	0.435024	0	0	-0.540005	0	0	-0.459226	0	0	0	0	0.46193	0.890266	0.579676	-0.403524	0	0	0	0	-0.58238	0	-0.522352	-0.552931	0	0	0	0	0	-0.397338	0	0	-0.562356	-0.407471	0	-0.608183	-0.590875	0	0	0.744699	0
SHEPARD_CRASH_AND_BURN_MUT_VS_WT	0	0	0	0.424952	0	0.461175	0.523752	0.618581	0	0	-0.648699	0	0	-0.411242	0	-0.430314	-0.461336	0	0	0	0	0.628695	0.648552	-0.503572	0	0	0	-0.587528	0	-0.499941	0	0	-0.535414	-0.548653	-0.580947	0.399906	-0.739599	-0.466789	-0.445859	0	0	0.442701	0.54207	0	-0.734684	0.436346	0.4467	0.382626	-0.531388
GH_GHRHR_KO_24HRS	-0.559677	0	-0.386227	0	0.36737	0	0.530356	0.542391	0.700066	0	0	0.550905	0.477377	0.544844	0.614715	0.936856	0.6339	0	0	0	0	0	0	0	-0.539915	0.484105	0	0.549752	0.680521	0.808442	0.784595	0.531839	0	0.626564	0	-0.487107	0	0	0	0.799413	0.719797	0	0	0	0	0	0	-0.488041	-0.392883
HBX_HCC	0	0	0	0.734182	-0.840591	-0.802557	-0.680267	-0.406183	-0.531583	0	0	0.566434	0.478416	0	0	0	0	0	0.72998	0.697897	0	0	0	0	0	-0.484009	0	-0.523563	0.467631	0	0	0.754542	0	0.572459	0	-0.659238	-0.698651	-0.610282	-0.557188	0.451402	0	0	0.770353	0	0	0	0.522207	0	0
IFN_BETA_GLIOMA	-0.388262	0	-0.709318	-0.548357	0.398027	-0.474623	-0.454915	0	-0.477554	0.573643	0	0.53242	0.647683	0.608919	0.478656	0	0	0	-0.539474	0.468021	0	-0.54226	-0.565069	0	0	0	-0.410915	0	0.441839	0	0.471077	0.494703	0.505158	0.51644	-0.512477	0	0	0.603232	-0.358479	0	0	0.665658	0	0	-0.648403	0	0	0	0
IL6_SCAR_FIBRO	0.525557	0	0.410611	0.516274	0	0.568593	0	-0.527696	0	-0.465665	0	-0.641796	-0.675819	0	-0.533239	-0.607939	0	-0.686029	0	0	0	0.56227	0.410546	0	0.432685	-0.546108	-0.558576	-0.581693	-0.64406	-0.603756	-0.560787	-0.597857	-0.873394	-0.677444	0	0.437781	0.836599	0.595493	-0.495987	-0.58899	0	0	0	-0.661086	0	-0.366844	-0.67894	-0.690311	0
HDACI_COLON_BUT48HRS	-0.608856	0.618694	0	-0.607275	-0.512233	0.399225	0	0	0	0	0.593897	0.365243	0.433274	0.556474	0	0	0	0	0.692708	0.563731	0	-0.618454	0.419257	-0.753715	0	-0.825815	0	0	0	-0.627399	0	0	-0.776285	0	0.568436	0.471186	0.70636	0.539277	0.648168	0.598056	0.578031	0.569002	0	0	0.431978	0	0.570711	0	0.685975
GH_AUTOCRINE	-0.900582	0	0	0.506413	-0.691321	0	0	0	0	0	0.635515	0	-0.453306	0	-0.43004	0.348717	0.340063	-0.473328	0.496545	0.500921	0.498875	0.346441	0	0	0.523684	0	0.393948	0.450676	-0.496216	0.325632	0.275742	0	0.330659	0.364384	0.418668	0.661043	-0.638499	0	0	0	-0.581984	0	0.58073	0.800234	0.578218	0.769267	0.82131	0.665972	0.40374
ZHAN_MM_MOLECULAR_CLASSI	0	0	0	0.597646	0	0.384999	0.441053	0	0	0.528241	0	0.500383	0	0	-0.464141	0	0	0	0.526375	0.45328	0	0.765303	0.448212	0	0.702792	0	-0.695322	-0.472122	-0.447021	0	0	-0.575096	0	0	0	-0.650234	-0.667158	0	-0.477169	-0.673554	0	-0.678403	0.429724	-0.428872	0	0.423435	0	0	-0.378007
ALZHEIMERS_DISEASE	0	0.689574	0	0	0	0	0	0	0.597997	0	0	-0.640335	0	0.552428	0	0	-0.633056	0	-0.70602	-0.7685	0	0	0	0	-0.629019	-0.660006	-0.533264	0	0	0	0	0	0	-0.613343	0	0.661949	0.910965	0.551598	0.592843	0.616689	0	0	0.584677	-0.588084	-0.443149	-0.598217	0	0	0
TSA_CD4	0	-0.328112	0.657618	0.664044	0.925035	0	0	0	0.536992	0.584641	-0.45574	0	-0.697235	0	0	0	0	-0.57852	-0.60144	-0.730183	0.488432	-0.323567	0.521176	-0.442283	0	0	0	-0.461496	-0.479729	0	-0.748783	-0.857981	-0.87575	-0.596014	0.538643	0	-0.573933	-0.667522	-0.43947	-0.430723	0	-0.510715	0	0	0	-0.641268	-0.803515	-0.64288	0
RIBAVIRIN_RSV	0.470354	0	0.604185	0	-0.57925	0	0	-0.540368	-0.670624	-0.758706	0.362131	0.554709	0	0	0.608948	0	0	0.653195	0	0	0	0	0	-0.584299	-0.416878	0.536421	0	0	-0.737954	0	0	-0.834833	0	0.599563	0	0.362295	-0.674854	0	0.433965	-0.630742	0.557772	0	0	0.440633	-0.532641	-0.710191	0.500008	-0.555581	-0.609125
REOVIRUS_HEK293	0.595915	0	0.442231	0	-0.538333	-0.633673	-0.540851	0	-0.373652	-0.564918	0	0	0	-0.55434	-0.406986	0	0.556277	0.413624	0	0	0.410233	0.499595	-0.376852	-0.382801	0.504758	0	0.469927	0	0	0.524394	0.39756	0.487085	0.619572	0.796437	-0.506948	0	-0.694534	0	-0.452853	-0.514632	-0.438054	0.60673	0	0.474669	0.601144	0.562406	0.497914	0.5426	0
ROS_MOUSE_AORTA	0.596635	0	0.483882	0	0	0.544998	0.440892	0	0.432661	0	-0.52324	0.550007	0	0	0	-0.497448	0.570133	0.573957	0.399475	0	0	-0.31942	0.770357	0	0.665963	0	-0.298367	-0.564001	0	0	0	0	0	0	-0.561657	0	0	0	0	-0.436831	0	-0.457157	0	0	0	0	0	-0.516247	-0.620354
LEE_MYC	0.506089	0	0	0	-0.61193	0	-0.491095	-0.61504	-0.58768	0	0	0.68682	0.609459	0.662281	0	0	0	0	0	0.618438	-0.477282	0	0	0	0	-0.669477	0.485384	0	0	-0.679478	-0.885652	-0.723355	-0.696351	-0.763427	0.72823	0.63498	0	-0.700776	-0.741268	-0.616797	0	0.408179	0.588869	0	0	0	0	0	0
FERRANDO_MLL_T_ALL	0	0.449762	-0.626506	0	0.353573	-0.460546	-0.484012	0	0	0.634412	0	0	0	0.755263	0.504248	0.72262	0.619205	0	0	0	-0.450247	0.330892	0.293166	0	0	0	0	-0.748586	0.500573	0	0	0	0	0	0	0	0.559513	0.550861	0	0	0	0.471837	0	-0.576701	0.342613	0	0	0	0.506193
ASTON_DEPRESSION	0	0.846632	-0.389626	0	0	0	0	-0.438717	0	-0.531147	0.491136	0.408875	-0.463284	0	-0.629163	0	0	0	0.561112	-0.494182	0.579014	-0.508082	0	-0.489097	-0.588046	0	0	0	0	0	0	-0.457974	0	0.417939	0.534506	0.398467	-0.651263	0	0	-0.642178	0	0	0.757571	0.574374	0	0.586983	0.75826	0.400179	-0.510544
AGED_MOUSE_HIPPOCAMPUS_ANY	0	0	0	0	-0.512977	0	0.663665	0	0	0	0	0	0	0	0	-0.525623	0	0	0	-0.625151	0.576224	0	-0.807928	0.537545	0.568762	0	0	0	0.615172	-0.512285	0.70102	0.898742	0.853097	0.952584	0	0.49605	0	0	0	0	0	0.560066	0	0	0	0.611673	-0.7014	0	0
GUO_HEX	-0.479456	0	0	-0.674917	0.6298	0	0	0.518792	0	-0.486443	0	0	0.712574	0.533264	-0.68068	0	-0.521623	0	0	0	0	-0.512473	0	0.714937	0.822398	0.569174	0.725296	0	-0.593396	0	0	0	0.850735	0	0.712017	0	0.657735	0	0	0	0	-0.602385	0	-0.750854	0	-0.695337	-0.593691	0.700285	0
P21_ANY	0	0.576056	-0.933974	0.457469	-0.568922	-0.629569	0	0	0	0	0	0	0.494867	0	-0.664479	0	0	0	0	0.624184	0	0	0.384541	0.6663	0	0.560758	0	0.477734	0.607341	0.526677	0	0.474775	0	0.559924	-0.655471	0	0.491951	0.485806	0.755204	0	0.565551	0.543843	0.60281	0	0	0	0.67775	0	0
CROONQUIST_IL6_RAS	0	0	0	0.758808	0	-0.426257	0	0	0.438203	-0.512358	0	0	0	0	0.441395	0	0.332256	0	0	0	0.409363	0.547872	0.433105	0	0	0	0.418037	-0.629484	0	0.540514	0.646379	0	0	0.459721	0	0	-0.703016	0	-0.563268	0	0	0	0	0.539533	0	0.571907	0.589786	0.484678	0
LEE_DENA	0	-0.693962	0.546233	0	0	0	-0.479762	0.738932	0.735873	0.710913	0	0.707326	0	0.93186	0.749269	0.674211	0.619957	0	0	0.664742	0	-0.613318	-0.906773	0	-0.534036	0	0	0	0.647169	-0.564274	0.800323	0.646961	0	0.648467	-0.630897	0.787454	0.674766	0	0.740526	0	0	0	0	-0.475791	0.721819	-0.566518	0	0	0
NADLER_OBESITY	-0.470361	0	-0.434486	0.447649	0.564099	0	0	0.584942	0.53404	0	0	0.72119	0	0.694035	0	0	0	0.670031	0	0	-0.492079	0	0	-0.523142	-0.564737	0	-0.671106	-0.69111	0	0	-0.669222	0	-0.667931	-0.753179	-0.430525	0	0.706223	0	-0.626127	-0.461388	-0.592456	-0.44059	0	0.298097	0	0	0	-0.558781	0
SHIPP_FL_VS_DLBCL	0	0	0	0	0	0	0	0	-0.600917	0	0	0.601924	0.478302	0.614533	0	0.5142	0	-0.677031	0.530156	0.539364	0	-0.519039	0	0	0.639462	0.600257	0	0	0	0	0.855389	1	0.783092	0.902865	0	0.501572	0	0	0	0.481103	0	0	0.549435	0.357247	0.529561	0	0	-0.48305	0
CMV_HCMV_TIMECOURSE_48HRS	0	0	0	-0.608626	-0.522106	0.912959	0	0	0	0	0	0	-0.782554	0	0	0	0	0	0.822063	-0.627538	0	0	0	0	0	0.58654	0	0	0	0.725073	0	0	0	0	0	-0.607062	-0.792766	0	0	-0.677301	0	-0.823244	0.671645	0	0	0	0.716981	0.798562	0
MAGRANGEAS_MULTIPLE_MYELOMA_IGL_VS_IGK	-0.636754	0.451805	0.609269	0.638471	0	0	0.686033	-0.744379	-0.924954	0	0	0.433491	-0.591966	0	0	0	0	0	0	-0.773716	0	0	0	0	0	0	-0.601842	0.435092	-0.547263	0.419257	0.602812	0	0	-0.429186	-0.563651	-0.516629	-0.626707	-0.480395	0	-0.518106	0.455814	-0.563768	0	-0.412925	0.526347	0	0.459387	-0.75515	-0.813693
CHANG_SERUM_RESPONSE	0	0	0	-0.414234	0	-0.4637	-0.432798	-0.320387	-0.458915	0	0	0.548592	0	0	-0.547042	0	-0.425719	-0.448355	0	-0.566573	-0.334304	-0.430751	-0.326624	0	0.600405	0.743192	0	0	-0.365087	0	-0.577246	-0.569564	-0.478223	0	-0.449389	-0.417385	-0.6852	-0.418581	-0.577628	-0.546337	-0.586996	0	-0.587875	-0.248774	-0.553043	-0.428921	-0.430731	-0.646985	-0.654232
WANG_MLL_CBP_VS_GMP	-0.430005	0.558433	0	0.393291	0	0.312998	0	0.4988	0	-0.759987	0.45201	-0.580605	-0.814687	-0.724702	0.528599	0	0	0	0	-0.551839	0	-0.410706	-0.478222	0.389149	0	0	0	0	0.523515	0.532297	0	0.550431	0	0	-0.662908	0	0.401158	-0.50354	0.584309	0.436458	0.548507	0	0	0	0	-0.399216	0	0.663577	0.502113
CMV_HCMV_TIMECOURSE_10HRS	-0.445138	-0.570116	0.452321	0.291522	-0.773181	0	0	0	0	0.555553	0	0	0	0	0.35714	-0.376045	0.34409	0	0	0	-0.559234	0.635583	-0.537113	0.497492	0	-0.70967	0	-0.586808	0	0.37486	0	0	0.429759	0	0.579036	0	0	-0.513079	0	-0.689522	-0.374705	-0.433071	-0.446188	-0.747234	-0.470643	0	0	-0.516702	0
BRCA1_OVEREXP	0.382096	0	0	0	0	0	-0.436389	0.48728	-0.696603	-0.651237	0.639331	-0.605624	0	-0.656926	0.513581	0	0	0.483174	0	0.62452	0	-0.506122	-0.704468	-0.749301	0	-0.58223	0.668521	0	0	0	0	0	0.776209	0.778038	0	-0.614467	0	-0.604738	-0.693714	0	0.536864	0.640071	0	0.417824	0.657155	0.458939	0.767901	0	0.790661
GH_GHRHR_KO_6HRS	-0.752981	0	-0.762418	0	0	0.549028	0	-0.756074	0	0	0	0	0	0	0.783993	0.548011	0.461533	0.586453	0	0.547725	0	-0.432277	-0.964908	0	-0.49899	0	-0.732595	0	-0.772886	-0.565824	0	0.584705	0	0.576517	0	0	0	-0.903261	0	0	0	0	0	0	0.548104	0.725539	0.489219	-0.406689	0
SANA_IFNG_ENDOTHELIAL	-0.458292	-0.598063	0	0	0	-0.367021	-0.455371	-0.50588	0	0.376492	0.476201	0.465388	0.496238	0	0.499405	0.531009	0.515675	0.679007	-0.658809	-0.567642	0.473011	0.410575	0.51029	0	0	0.433232	0	-0.54002	0	0.574984	0.746381	0.563983	0.609065	0.606313	-0.58388	0.509209	0	0	-0.529029	0.674866	0.552995	0	0.728958	0.582475	0	0	0	-0.567895	-0.617475
SHEPARD_BMYB_MORPHOLINO	0.337865	-0.504199	0.491932	0	0.543969	0.342858	0	0	0	0.438255	0	0	0	-0.628802	0	-0.487516	0	0	0	0	0	0.481482	0	0	0.783392	0	0.380974	-0.6672	0	0	0	0	0	0	0	0	0	0	0.363741	0	0	0.655528	0.672307	-0.589093	-0.633414	0.400807	0.505175	0.339282	0
ABBUD_LIF_GH3	0.462053	0	0	0	0.557847	0	0	0	0	0.468093	-0.365689	0.606744	0	-0.57547	-0.531454	-0.553353	-0.518726	0	-0.693662	-0.566079	0	0	-0.602547	0	0	0.513662	0	0.634965	0	0	0	0.548555	-0.444514	0.491165	-0.557618	0	0.935217	0.517087	0	0	0.572512	0.853438	0.478907	0	-0.469569	0.47919	0	0.836839	0.950479
WELCSH_BRCA	0	0	0.502482	0.659727	0	-0.47724	0	0.473375	0	-0.358074	0.435281	0.42811	0	0	-0.513778	0	-0.558469	0.591794	-0.672973	0	-0.405765	-0.615494	0	0	0.328234	0	0.509339	0	0	0.47171	0	0	0	0	-0.300964	-0.369621	-0.424386	0	0.402215	0	0	0.782265	0	0	0.667303	0	0	-0.591849	0.555761
GN_CAMP_GRANULOSA	0	0.683718	0	0	-0.69063	0.521214	0.428328	0	0.523657	-0.498392	-0.618152	-0.480067	-0.552614	-0.749557	-0.514166	0	0.513596	0.632734	0.430993	0	0	-0.790109	0	0	0	-0.649336	0.462919	0.457194	0	0	-0.455396	-0.78481	0	-0.550048	0	-0.541882	0	0	0.372662	0	-0.558422	0	0	0	-0.544357	0.295861	-0.575202	0	0
ALZHEIMERS_INCIPIENT	0	0	0	0	0	0	0	0	0	-0.609378	0	-0.743771	-0.508495	-0.514403	0	0	-0.781709	0	0	-0.776313	0	0	0	0	-0.634323	-0.598196	0.62576	0	0	0	0	0	0.615757	0	0.659606	0.636277	1	0.576701	0.708588	-0.590748	0	0	0	-0.409617	-0.543443	-0.365825	0	-0.607078	0
CMV_ALL	-0.403654	-0.498164	0	0	0	0	-0.526552	-0.437373	-0.572324	-0.528798	0	-0.504871	0	-0.735808	-0.495418	0	0	0	0	0.633192	0.546102	0.655762	0.350792	0.643007	0	0.650323	0	-0.670787	0	0	-0.523415	-0.542636	0.549715	0	-0.664023	-0.53852	-0.768009	-0.585927	-0.632843	0	-0.698806	0	0	0.544491	0	0	0.497242	0.543971	0.623815
DOX_RESIST_GASTRIC	0	0	0.567638	0	0.546218	0.590274	0.348969	-0.553733	0	0.626823	0	0	0	0	0	0.693557	-0.577411	0	0	-0.484169	0	0	0	0	0	0.570468	-0.455594	0	0.66105	0	0	-0.466998	-0.525061	0.496616	0	0	0.560524	0	0	0	0	0	0	0	0	0.412346	0	-0.629989	0
IL1_CORNEA	-0.385559	-0.426441	0.50644	0	0	-0.619662	0	-0.480017	-0.61878	0.564538	0	0.52433	0.653148	0.583041	0.51563	0.602444	0.734639	0	0.565557	0.658255	0	0	0	0.717241	0.500506	0.605224	-0.508334	0	0	0.590006	0.829947	0	0	0	-0.454304	0.620469	0.433598	0	0	0.534595	0.682919	0.495534	0	-0.561335	-0.379534	-0.425195	-0.717191	0	0.478315
BCRABL_HL60_CDNA	0	-0.570279	0	0	0.424978	0	0	0	0.538347	0	0.628224	0	0	0.576255	0	0.648916	0.667156	0.46342	0	0	-0.428767	0	0	-0.746843	0.51764	0.513215	-0.744319	0.481537	0	0	0.789245	0	0.608729	0.700876	0.465053	0.522571	0	0.519648	0.655971	0.398986	0	0	-0.879047	-0.913744	-0.388357	0	0	0	0
STRESS_GENOTOXIC_SPECIFIC	-0.51384	0	-0.488704	0.503238	-0.646069	0	-0.639865	0	0	0	0	0	0.407471	0.39041	-0.400059	-0.374199	0	0.462372	-0.488404	-0.674105	0.625745	-0.676648	-0.543546	-0.681983	-0.800284	0	-0.679716	0.459348	0	0.561529	0	0	0	0	-0.436601	0	0	0	0	0	0	0.520416	0	-0.560985	0	0.30771	-0.495412	0.415575	0
IGF_VS_PDGF	0.555188	0	0	-0.548543	0	0	0	0.687648	-0.601882	0.605299	0	-0.74429	0	-0.717211	0	0.832694	0	-0.752743	0	-0.477541	0	0	0	0	0.654594	0.624219	0	0.683288	0	0	0	0	0	1	0	0	0	0	0.779	0	-0.556606	-0.541804	0.538311	0.59836	0.551374	0.479664	0	0.660243	-0.83908
KUROKAWA_5FU_IFN_SENSITIVE_VS_RESISTANT	0	0.409153	-0.509936	0	0	-0.71139	-0.563277	0.429343	0.695537	0	0	0	0.753731	0	0	0	0	0	0	0.612326	0	0	0	0	0	0	0.416074	0	0	0	0	-0.616959	-0.381143	0	0.662182	0	-0.701299	-0.888915	0	0	0	0	0.519555	0.577497	0	0.512089	-0.571917	0	0
CMV_HCMV_TIMECOURSE_14HRS	0	0.635962	0.673557	0	0.462027	0.565264	0.513641	0.563123	0	0	-0.557094	0	0	-0.584898	0	0	-0.547474	0	0	0	0	0	0.530076	-0.54807	-0.590827	0.708496	-0.623333	0	-0.69575	-0.607462	-0.811753	-0.858853	-0.665936	-0.80575	0	0.797672	0.722439	0	0.609173	0	0.524538	-0.557458	0	-0.595504	0	-0.602929	-0.655268	0	0
CMV_HCMV_TIMECOURSE_12HRS	0.360758	0	-0.46542	0.525927	-0.504842	0	0	0	0	0	0.263626	0	0	-0.50415	0	-0.517362	0.393809	0	0	0	0	0.765219	0	0.35147	0	0.375061	0	0.276576	0.357423	0	0.596429	0.425213	0.275593	0.402972	0	0.359319	0	0	-0.30423	-0.510619	0.359384	-0.510317	0	0.356844	-0.479487	0	0	0.586741	0
UVB_SCC	0.494712	0	0.544736	0	0	0	-0.452493	0	-0.830739	-0.74196	0	-0.610382	-0.621652	0	0	0	0	0.431842	0	0.464969	0	-0.645621	-0.729268	0	0.434252	0	0.464434	0	0.419682	0.433416	0	0	0.402641	0	-0.622787	-0.690779	-0.884607	0	0	0	0	0	0	0.317181	0.329647	0	0	0	0
FALT_BCLL	0	-0.458337	0.471418	0	-0.392709	0	0.385928	0	0	0	-0.484876	-0.476338	-0.503446	0	0	0.552691	0	0	0	0.442482	0	0	-0.31685	0.661938	-0.54078	0.595522	-0.629457	0	-0.588023	0	0	0	0	0	0.664249	0	0	0	0	0	-0.506899	-0.521509	-0.65421	-0.537243	-0.634132	0.398605	-0.832319	-0.521817	-0.88142
PENG_RAPAMYCIN	0	0	0	0.392975	0.304463	0	0.223825	0	0	0	0	0	-0.656305	0.423765	0.362186	0.411878	-0.7759	0	0	0.461226	0	-0.766515	-0.444621	0	-0.713404	-0.659846	0	0	0	0	0	0	0	0	0	0.509107	0.6166	-0.651591	0.436347	0.389052	0.55115	0	0	0	0.559639	0.400059	0.466912	0	0.493979
METASTASIS_ADENOCARC	0	0	0	0	-0.535893	0.626107	0	0	0	0	0	0	0.48471	0.663448	0	0.525111	0	0	-0.55295	0	0	0	0	0	0	0	-0.489729	-0.72351	-0.37605	-0.440576	-0.904726	-1	0	-0.75141	0	0	0.398106	0.455803	0	-0.471628	-0.577341	0	-0.520727	-0.424543	0	0	0	-0.438644	0
MMS_HUMAN_LYMPH_HIGH_24HRS	-0.551505	0	0	0	0	0.393735	-0.504509	0.546337	0.495073	0.559441	0.580779	0.505084	0	0.399114	0.623798	0	-0.745072	0	0	0.825493	0	-0.602215	-0.350163	0	-0.439425	0	0	0	0	-0.713182	0.524586	0	-0.599121	0	0	0.621966	0.722412	-0.648709	0	0	0	0.503701	0.800881	0.495708	0.618102	0.947341	0	0.430332	0.737451
CPR_LOW_LIVER	0.424683	-0.426197	0.524837	0	0	0	0	0	0.751931	0	-0.591525	0	0.595753	0	0.769619	0	0	0	0	0	0	0	0	0	-0.592737	0	0	-0.67515	0	0.616289	0	0	-0.526736	-0.545488	0.4554	0	-0.879717	0.545126	0	0.567876	0	-0.39852	0	0	-0.62296	-0.711561	-0.631918	0.540837	0
IRS_KO_ADIP	0.536203	-0.550116	0	0.474248	-0.282066	0	0	0	-0.704353	0	0	0.83288	0	0	0.583108	0.940692	0	0	0	0	-0.34732	0.669738	0	0	0	0	0	-0.656221	0	-0.629033	0	-0.622474	0	-0.597406	0	-0.668959	-0.647106	-0.846267	0	-0.506517	0	0	0	0	-0.539547	0	0	0.74391	0
HALMOS_CEBP	0	-0.699951	0	0	0	0	0	-0.635204	0.712849	0	0	0.404233	0	0	-0.655647	0	0	0	0	0.479653	0	0.658409	0	-0.730535	-0.524326	-0.696388	-0.514098	0	-0.645042	-0.916006	0	0	0	0	0	0	-0.720604	0	0	0.435322	0.489589	0.38205	-0.384308	0.398642	0	0	0	-0.813519	-0.742356
SERUM_FIBROBLAST_CORE	0	-0.471295	0	0	-0.342339	-0.349307	-0.338615	-0.372991	-0.476865	0	0	0	-0.455635	-0.5153	0	0	-0.40708	-0.498537	0	-0.533844	-0.33897	-0.455159	-0.340607	0	0.863046	0.751409	0	0	0	0	-0.657608	-0.555327	-0.606844	-0.547144	-0.546009	-0.474774	0	-0.414966	-0.474737	-0.538664	-0.616319	-0.47177	0	0	-0.62735	-0.393387	-0.586975	-0.639705	-0.597341
HCC_SURVIVAL_GOOD_VS_POOR	0	0.655857	0	0.512755	0.49603	0.439548	0.313856	0.542553	0	-0.621178	-0.549544	0	0.571482	0.565882	0.483682	0.627116	0	0.615744	0	0.498273	0.516194	0.59019	0.477002	0.600217	0	0.492147	0	0	0	0.622738	0.582595	0.574594	0.449224	0	0	0.476957	0.660127	0	0.690599	0.616284	0	-0.525233	0.651329	-0.598451	0	0	0	0.732301	-0.617575
DSRNA	0	0	-0.357275	0	0	0	0	0	0.562828	0	0.614025	0	-0.492771	0	0.464041	0	0	-0.470545	-0.579328	0	0	0.558468	-0.498228	0.589589	0	0	0	0	0	0	0	0	0.648662	-0.366695	0	0	0.707428	0	-0.398177	0	0.528602	0.668415	-0.38274	0.683664	0	0.629661	0	0	0.661791
UV-4NQO_FIBRO	0	0	0.573726	0.673103	0	0	-0.512088	0	0.637952	0	-0.903943	0	0.668183	-0.607972	0	0	0	0	0.461419	0	0	0.404738	0.522463	0	0	0	0	0	0	0.969584	-0.708926	0	-0.658962	0	-0.592622	0	0.67833	0.603628	0	0	0	0.892608	0	0	0	0	0	-0.498676	0.68643
ABBUD_LIF	0	0	0	0	0	0.603494	0.521065	0	-0.484835	0	-0.765722	0	0	0.629822	0	0	0.794462	0	0	0	0.559633	0	0.583919	0	0.529459	0.459545	-0.36816	0	0	0.5129	0.677997	0	0.46765	0	0.569182	0	0.661799	0	0	0	0	-0.45309	0	0	-0.528901	0.623179	0	0.703339	0.598201
LEE_MYC_TGFA	0	-0.712209	0	-0.484382	0	0	0.310208	0	0.698146	-0.623474	0	0	0.617111	0.599279	0	0	0	0.575506	0	0	0	0	-0.475736	-0.85569	0	-0.813626	-0.695404	0	-0.615488	0	-0.830701	-0.623072	-0.748718	0	0	0	0.497982	0	-0.70224	0	0	0	0.429544	-0.538596	0.401297	0	0.71361	0	0.610758
LVAD_HEARTFAILURE	0	0	-0.48641	-0.605937	0	0	-0.644036	0	-0.69943	0	-0.71544	-0.62313	0	0	0.437713	0	0	0	-0.726727	-0.560414	-0.422776	0.293874	0	-0.582012	0.376202	-0.593055	0	0.54418	0.483653	0	0	0	0	0	0	-0.69167	0.427994	0	0	0.498289	0	-0.496386	0	-0.797881	0.4147	0	0.640683	0.474802	-0.528034
EMT	-0.756479	0	0	0.555883	0	0	-0.436315	0	0	-0.70066	-0.547076	0	0	0	0	0	0	0	-0.363753	-0.35402	0.89209	0	0	0	0.620854	0.611393	0	0	-0.54837	0	0	0	0	0	0	-0.568537	-0.579134	0	0	0	0	0	0	0	0	0	0	0.399679	0
CMV_HCMV_TIMECOURSE_24HRS	0.474899	-0.601063	-0.356761	-0.400595	0	0	0	0.453803	0	0.650925	0	0	0.582444	0	0	0	0	-0.620579	0	-0.523615	0	0.61314	0	0	0	0.530924	0	-0.576839	0	-0.752788	-0.569998	-0.577347	-0.64538	-0.720019	0	-0.702311	-0.515925	0	-0.535514	0.537919	-0.513729	0	-0.5203	0	0	-0.574738	0	0	0.506768
LH_GRANULOSA	0	0	0.530612	0	-0.618974	0	0.378653	0	0.462213	0	-0.449234	0	0	-0.614422	0	0	0	0	0	-0.450013	0	-0.623903	0	0	0.594491	-0.637145	0	-0.628964	0	0.525874	-0.663959	-0.715996	-0.524075	-0.534021	0	-0.675102	0	0	-0.452366	0	-0.565312	0	0.593575	0	0	0.369373	0	-0.761306	0.588237
ROTH_HTERT	-0.481895	0	0	0.646141	0.706169	0	0	0.659552	0	-0.479217	-0.717775	-0.637234	-0.624866	-0.967573	-0.664085	-0.452067	-0.718512	0	0.607186	0.620967	0.853146	0	0	0.548194	0	-0.582363	0	-0.510922	0.395389	0.519604	0	0	0	0	0.47955	0	0.691663	-0.478119	0	0	-0.78997	-0.598755	0	0.811657	0	0.570027	-0.857376	0	-0.585058
HDACI_COLON_BUT	-0.486944	0.49557	-0.471829	-0.533515	-0.529133	0	-0.451608	0	0	0	0.534465	0.370138	0	0.554834	0	0.501985	0.541631	0.503419	0.638357	0	0	-0.494319	0	0	0.441152	0	-0.548377	-0.563729	-0.406274	-0.531543	0	0	-0.837784	-0.68899	0.603637	0.557561	0.703637	0	0.661409	0.538915	0.532842	0	0.640915	0	0.423262	0.4815	0.580709	0	0.676796
LE_MYELIN	0.64009	0	0	-0.360047	0	0	-0.490169	0	-0.476701	0	0.558584	0	-0.491896	-0.513776	0	0	-0.497646	0	0	-0.711055	0	-0.652049	-0.553709	-0.463744	0	0.718159	0.40359	-0.47831	-0.423506	0	-0.416447	0	-0.623677	0	-0.587236	0.475882	0.463625	-0.464738	-0.505702	-0.417753	0	0	0	0.793245	0	0.530833	-0.367854	-0.618427	0
AGED_MOUSE_MUSCLE	0.485137	0	0	0	0.413087	0.371264	0.487305	0	0	0.532026	-0.401142	0.438741	-0.483959	-0.883834	-0.599027	0.388782	-0.497693	0	0	0	0	0.582983	0	0	0.568996	0.654147	0	0	0.539246	0	0	0	0	0	0	0.533233	0	-0.555782	0.328401	0	0	0	0	0.354547	0.695616	0.424692	-0.577505	0	0
WERNER_FIBRO	0.509195	0	0.77195	0.684887	0.499111	-0.910865	0	0.596902	-0.786399	0.521987	0	-0.710227	0	0.888877	0.835819	0.672737	0.820449	0.772723	0	0.578581	0	0	0	0	-0.65022	0	0	0.795255	-0.475546	0.802007	0	0	0.789684	0	0	-0.71223	-0.635222	0.635162	0	0	-0.599725	-0.717546	0	0.436379	0	0.729902	0.625467	-0.783636	0
FLECHNER_KIDNEY_TRANSPLANT_WELL	0.498901	0	0	0	0.342483	-0.429527	0	0.618192	-0.462411	-0.550913	-0.471003	0	0	0	0.483061	0	0	0	0	-0.42482	0	0	0	-0.447639	0.589108	0	0	0	0	0	0	0	0.80218	0.722337	-0.594907	-0.581034	-0.549765	0	-0.58547	0	-0.378622	0.734724	0	0.713776	-0.5862	0.387802	0	0.545927	0.709756
UVC_TTD-XPCS_COMMON	0	0.435485	0	0	0.307579	-0.483656	-0.532008	0.22518	0	0.433831	0	0	0	0	0	-0.482872	0.355302	0	0	0.478491	0	0	0	0.321388	0.365944	0	-0.48041	0	0	0.38052	0	0	-0.694034	-0.611336	0	0	0	0	-0.574304	0	0	-0.922844	-0.396124	0	0	0.527775	-0.574361	0	0
UVB_NHEK2	0	0	0	0	-0.627053	0	-0.513561	0.617832	0	-0.628757	0.652921	0	0	0.576338	0	0	0	-0.645336	0	0	0	0	0	0	0.705104	0.636391	-0.643805	0	0	0	0	0	0	0	0.795081	0	0	0.690334	0	0	0	0	0	0	0.667793	0	-0.629968	0.608427	0
BRG1_ALAB	0	-0.724427	0	0.494521	0	0.432578	0.327368	0	0	0.500559	0.671322	0.519019	-0.601698	0	0.303038	0.456822	-0.440503	-0.595019	0.471358	0.504523	0	0	-0.415835	0	0	0	0	0	0	-0.678487	0	0	-0.38828	-0.527711	0	0.465209	0	0.404851	0	0	0.542902	-0.556006	0.598666	0	0.472464	0.513196	-0.874961	0	0
BRCA2_BRCA1	-0.324382	-0.518786	0.409066	0	0	0	0	0.609683	0	-0.596583	-0.722291	0	0.613155	0	0	0	0	0.633367	0	0	0	0	0	-0.514143	-0.610864	0	0	0	0	0.784329	-0.679294	0	0	-0.638937	-0.762381	0	-0.437694	0.425067	0	0.486716	0	-0.401828	-0.593202	0	0	0	-0.75225	0	-0.670747
ZHAN_MM_CD1_VS_CD2	0	-0.585502	0	0	-0.707379	0	-0.525372	-0.512856	0	0	-0.848186	-0.796414	-0.660392	-0.601305	0.738421	0.491769	0	0.651713	-0.459931	0.532613	0	-0.63281	0	0.650651	0	0	0.641692	0.714605	0.739498	0	0	0	0	0	-0.527464	0	0	0.684116	-0.685774	0	-0.737905	0.761862	0.480705	-0.675008	0	0.729962	0	0	0
ELONGINA_KO	-0.49928	0	0.407492	0	0.593113	-0.447114	0.4172	0.815767	0	0.497124	0	0	0	0	0	0	0	0.421825	0	0.616859	0	0.523283	0	0	0.442617	0	0.695424	0.531659	0.594296	0.560048	0	0	0	0	-0.593203	0	0	-0.424498	0	-0.540912	0	-0.592817	-0.811994	0	-0.677124	0.547319	-0.59979	0.861038	0
RETT	0.563441	-0.526733	0	0	0	-0.53802	-0.566662	0	-0.70779	-0.80924	0	-0.630117	0	0	0	0.884034	0.732506	0.704323	0.497095	0	0.395375	0	0	0	0.655018	0	0	0	0	0.778686	0	0	0.837925	0	-0.797634	-0.593371	-0.645999	-0.711077	0	0	-0.900702	-0.488653	-0.557776	0	0	-0.404211	0.477101	0.302909	-0.725697
CHEN_HOXA5_TARGETS	0.31584	-0.531547	0.376966	0	0	-0.470909	0	0	-0.442169	0	0	-0.594712	0.303302	0	-0.42333	-0.526596	0	-0.444645	0	0.321481	0	0	0	0	0	0	0.350349	0	0	0	0	0	0.571395	0.574981	0	0	0.49453	0	0	0	0	0	0	0	0.519412	0.297173	0.532222	0.564109	0.770776
TAKEDA_NUP8_HOXA9_6H	0.564768	0	0	0	0	-0.70879	-0.513287	-0.676716	-0.733317	0	0	0	0	0	0	0.525558	-0.503838	-0.876975	0.60696	0	0.463693	0	0	0	0.746439	-0.385429	0	0	0	0.82664	0.618398	0.878368	1	0.62067	-0.748813	-0.666302	-0.969655	-0.612736	0	-0.583216	0	0.609927	0	0.778649	0.689207	0	0.996542	-0.445204	-0.797687
SANA_TNFA_ENDOTHELIAL	-0.530175	0	0	-0.485271	0	-0.465694	0	0	-0.45224	0.544434	0.6614	-0.452433	0.592316	0	0.51482	0	0.547698	0.581614	0	0.51643	0	0	0	0	-0.57408	-0.481305	0	-0.555114	0	-0.475452	0	0	0	0	-0.592693	-0.367924	0	0.526487	-0.448842	0	0	-0.393732	0	0.503204	0	0	0.67585	0.715119	0
YAO_P4_KO_VS_WT	0	0	0.537894	-0.465939	0	0	0.603561	0	0	0.868762	0	-0.764978	-0.591707	0	0	0.742932	0	0	-0.713264	-0.598626	0	0.623877	0	0	0	-0.700636	0	0.633748	0.771897	0	0	0.80602	0	0	-0.621994	-0.685665	0	0	0	0.668378	0	0	0	0	0.596455	0.490137	-0.657257	0	0.789798
MOREAUX_TACI_BAFF	0	0	0	0	0	0	0	0	-0.52889	-0.620692	0	-0.737658	0	0	-0.333735	0	0	-0.420825	0.845277	0	-0.691633	0	0.987942	0	-0.710645	0	0.826277	0	0	0	0.451697	0	0	0.460217	0	0	0	0	-0.633685	0	-0.518344	0.650121	-0.441465	0.943025	0	0	0	0	-0.569919
CROMER_HYPOPHARYNGEAL_MET_VS_NON	0	0.539116	-0.568629	-0.584598	-0.546959	0	-0.3814	-0.293987	0	0.331882	0.442343	-0.328612	0	0.41646	0	0.398784	0	0.396255	0.481183	0.568679	-0.451613	-0.813234	-0.535702	-0.524647	0	-0.540948	0	-0.458054	0.443271	-0.408059	0	0	0.440483	0	0.414895	-0.390856	-0.403106	-0.388213	-0.558494	0.391967	0	0	0	0	0.644093	0	0.514696	0.824794	0.62854
MOREAUX_TACI_HI_VS_LOW	0	0.437074	-0.397744	0.473466	0.471573	0	0	0.456526	0.396632	-0.614575	-0.511364	-0.443797	0.479635	0	0	0.596668	0.505937	0.435757	0.421405	0.390101	0.461823	0.520926	0.479198	0	0	0	0	0.49849	0.504775	0.660599	0.843778	0.758035	0.526354	0.616655	-0.472713	0.38524	0.532589	0.42923	0.460542	0.524121	0	-0.407567	0.453608	0	-0.374631	0	0.341598	0.43839	-0.542502
VERHAAK_AML_NPM1_MUT_VS_WT	0.550735	0.392944	0	0	0	0	0	0.631665	0.657317	-0.774754	0	0	0	0	0	0	0	-0.607874	-0.901159	-0.543916	-0.514619	0	0	-0.701666	-0.657466	-0.592081	-0.564038	0	-0.685188	-0.634662	-0.727065	-0.5987	0	-0.755569	0	0	0.752582	0.633093	0	0	0	-0.683332	0	0	0.586872	0	0	0	0.777246
WONG_IFNA_HCC_RESISTANT_VS_SENSITIVE	-0.70519	-0.705545	0	0	0	0	-0.560538	0	0	0.488604	0.469043	-0.420553	0	0.5045	-0.498884	-0.64344	0	0	0.546968	-0.693077	0	0	-0.792934	0	0	0	-0.54934	0.477786	0	0	0	0	0.530175	0.647439	-0.655573	0.418979	0	0	0	0.586883	0.497828	0.499905	0	0.491807	0.422883	0.621783	0.509043	0	0
PENG_GLUCOSE	0	0	0	0.666018	0.319439	0	0	0	-0.604519	0.587474	0	0.551502	0.495225	0.539383	0.583112	0.736305	0	0	0.505347	0.669082	0.47821	0.465763	0.455588	0	0.529627	0.426754	-0.768848	0	0.507745	-0.631701	0	0	0	0	0	0	0	0	0	0.616768	0	-0.607167	0	0.427958	0	0.505661	0.487738	0	-0.735641
CMV_8HRS	0	0	-0.610023	0.361061	0	0	-0.598094	-0.428211	-0.354048	0	0.433188	-0.569968	0	-0.57386	0.275842	0.392293	0	0	0.484721	0.565183	0.581412	0.542684	0.343632	0	0	0.38542	0	-0.487699	-0.321407	0	-0.368204	-0.274621	0	0	-0.568407	0	-0.669546	0	0	-0.694241	0	-0.560865	0	0.3462	0.544453	0.302312	0	0.31025	0
FSH_GRANULOSA	0	0.715433	0.517525	0	-0.5988	0	0.395971	0	0.482951	-0.543432	-0.483505	0	0	-0.595308	0	0.544804	0	0	0	-0.450306	0	-0.612862	0	0	0.613524	-0.620112	0	-0.643609	0	0.539462	-0.671734	-0.74644	-0.509284	-0.537422	0	-0.691886	0	0	-0.451954	0	-0.566876	0	0.588769	0	0	0.366783	0	-0.762289	0.599861
CHEOK_HDMTX	0.578871	0	0	0.835674	-0.412765	-0.406164	-0.365624	0.459424	0.623118	-0.593955	0	0.578452	0	0	0	0.564977	0	0	-0.618779	0.550991	0	0.708325	0	0	0	0	-0.494315	0	0	0	0.739757	0.72502	0.887128	0.670953	0	0	-0.824564	0.352093	-0.463667	0	0	0	0	0	0	0	0	0.525627	0
UVC_XPCS_4HR	0	0.490093	0	0	0	0	0	0	-0.496295	0	0	0.33068	0	0	0	-0.436959	0	0	0	0	0	0	0	0.445415	0	0	0	0.385431	-0.47705	0	0	-0.832946	-0.933161	-0.672632	0	0	0	0	-0.549335	0	-0.452075	-0.354955	0	0	0	0.476699	-0.437974	0	0
ZMPSTE24_KO	0.715376	-0.406276	0	0.718332	0.608444	0.587083	-0.649008	0.553409	0.492736	-0.375181	0	0	-0.447411	-0.535945	0	0	-0.452886	-0.533223	0	0.56175	0.655604	0	0	-0.52009	-0.442167	-0.398918	-0.562928	-0.525442	0	0.620207	-0.797919	0	-0.69055	-0.697509	-0.492929	-0.574774	0	-0.506495	-0.478459	0	-0.480639	0.633463	0	-0.329649	0	0	-0.511443	0	0.601935
UVC_LOW_ALL	0	-1	0	0.44175	0	0	-0.424661	0.42478	0	0	0.372473	0	0	0	0	0.343219	0	0	0.605568	0	0	0.851443	0	0	-0.414793	0	0.691711	-0.624222	-0.536821	0.508079	-0.427132	-0.615743	0	0	-0.452627	0	0	-0.503393	-0.413556	-0.380474	0.457448	-0.675998	-0.746827	-0.538973	0.652963	0.803192	-0.624519	-0.69093	-0.463455
ZELLER_MYC	-0.532495	0	0	0.480789	0	-0.36964	0	-0.607772	-0.668711	0	0	-0.532592	-0.437968	0	0	-0.435134	0.356874	0	-0.578029	0	0	0	0	-0.56922	-0.433038	0.459061	0	0	0	0	0.640564	0.559883	0	0	-0.569538	-0.484451	-0.75697	-0.502614	-0.449948	0	0	0.46188	-0.576027	0.468328	0	0	0	0	0
CANTHARIDIN	-0.457141	0	-0.483274	0.52158	0.314567	0	0	0.464137	-0.7341	0	0	0	0.3859	0	0	0.448234	-0.626628	0	-0.505055	0.398511	0	0	0	0.578614	0	0	0	0.414834	-0.737272	0.589865	0	0	0	0	0.534429	0.770092	0.842615	-0.578259	0	0	0	0	0	0	0	0.317261	0.430205	0.55317	0.650108
PENG_GLUTAMINE	0	0	0	0.496401	0.369725	0.381258	0.263016	0	0.470435	0	0	0	0.476805	0	0.443278	0.429762	-0.851014	0.456667	0	0.464614	0	-0.869253	-0.450322	0	0	-0.780817	0	0	0	0	0	0	0	0	0.415629	0.492213	0.624363	0.430022	0	0	0.537949	0	0	0	0.633787	0.520035	0.598325	0.519594	0.643596
HDACI_COLON_BUT16HRS	0.350149	0	0.371409	0.39175	0.344079	0	-0.369274	-0.564316	0	0	0.34498	0	0	0	0	0	0	0.373667	0.334691	0.385622	0	0.37815	0.520981	0	0	0	0.400268	0	-0.420445	0	0	-0.600698	-0.824361	-0.71396	0.377137	0.319101	0.494123	0.355531	0.628864	0.522303	0.478289	0.410234	0	0.316819	0	0.526792	0.382761	0	0
AS3_HEK293	-0.493266	-0.872426	0	0	0	0	-0.432245	0.521863	0	0	0	0	0	0	-0.523334	0	0	0.825249	0	0	0	0	0	0	0	0	0.450298	0	-0.46408	0.381645	0	-0.664273	-0.691182	-0.625216	0.750495	0.568469	0.487	-0.523682	-0.46496	0	0	0	0	0	0	-0.595327	0.728579	0	0.926598
AGEING_KIDNEY_SPECIFIC	0.40667	0	0.368131	0.578194	0.535725	0.391074	0.530792	0.694743	0	0	0.55011	0	0	0	-0.532472	0	-0.513348	-0.589161	0	0	0.352455	0	0	0.673382	0	0	0	0.486196	0	0.44941	0	0	0	0	0	0.555724	0	0	0.515011	0	0	0	0	0.476299	0	0	0	0	0
NF90	-0.601057	0	-0.83454	-1	-0.710006	-0.808039	-0.802491	-0.450306	-0.801473	-0.575188	-0.615249	0	0.562273	-0.473966	0.37955	-0.393414	0.614182	0	0.487925	-0.516174	0	0	-0.690361	0	0	0	0	0	0	0.481462	0.627066	0	0.467054	0.488756	0	0	0	0	0	0	0	0.573783	0.612407	0	0	-0.467727	0.471824	0	0
FRASOR_ER	0	0	-0.498745	0	0	0	0.477921	0	0	0	0	-0.315515	-0.555454	0	-0.316913	0.327767	-0.50809	0	0	0.358817	0	0.528763	0.448665	0	0	0	0	0	0	-0.317943	0	0	0	-0.306671	0	-0.276874	0	0	0.290601	-0.361488	-0.354793	-0.67551	-0.801278	-0.411936	-0.653264	-0.593165	-0.544979	0	0
CARIES_PULP	0.310013	0.355728	0	0.531875	0.414164	0	0	0.740933	0.814187	0	0.558593	0.602497	-0.513013	0	0.531707	0	0	0	0	0.629254	0.385767	0.337067	0	-0.575814	0	-0.516705	0	-0.61031	-0.511306	-0.619927	-0.683867	0	-0.57595	-0.681338	0	0	0.802297	0	-0.487039	0.619175	0	0.469241	0.637989	0	-0.250033	0	0.54176	0	0.756192
MUNSHI_MM_VS_PCS	-0.595736	0	0.436615	0.657948	0.629626	0	0	0	0	-0.76724	-0.565443	0	0	0.663208	0	0	0.624482	0	0	0.426401	0	0	0	-0.801758	0	0	0.562878	0	0	0.574238	0.637799	0	0.522004	0.680328	-0.845502	-0.7934	-0.642959	0.485553	-0.558883	0	0	0.65626	0	0	0.415374	0	0.964269	0.700151	0
CAMPTOTHECIN_PROBCELL	0.615097	0.401602	0	0	-0.453837	0.48686	0.384972	0	-0.673789	0	0	0	0	0	0	0	0	0	0	-0.702251	0.51214	0	-0.595027	0	0	0	0.758494	0	0	-0.625048	-0.776419	-0.867947	0	0.532807	0.607985	0.632469	0.805849	0.556546	0	0	0	0	0	0	0.676128	0	0	0.465115	0
UVC_HIGH_ALL	0	0	0	0.639544	0	0.480478	0.573341	0	0	0	0.487055	-0.524334	0	0	0	0.497969	0	0	0.474969	0.634353	0.294799	0.634657	0.534978	0	0.39514	0	0	0	-0.508259	0.708236	0	-0.474231	-0.534594	-0.635047	-0.464768	-0.483417	0.438396	0	0	0	0.327931	-0.567264	0	0	0.42561	0	0.504101	0	0
TNFALPHA_TGZ_ADIP	0	0	0	0.539079	0	-0.664125	-0.533124	0	0	-0.877807	0	-0.370062	0	-0.505831	0.589643	-0.514001	0.593053	-0.412892	-0.520978	0	0	0	0.602538	0	0.557307	0.613054	0	0	0	0.57317	0	0.837687	0.735554	0.87011	-0.635418	-0.614123	0	-0.633692	-0.506725	0.652175	0.459259	-0.451121	0	0	0	-0.439137	0	-0.539797	0
IGFR_IR	-0.416945	0	0	-0.582702	0	0	0.619082	-0.41803	0	0	0	-0.536126	-0.669151	0.600039	0	0.72493	0.701637	0.475552	-0.550305	-0.601185	0	0	0.512265	-0.669867	0	-0.409077	-0.459641	-0.591531	0.662397	0	0	0	0	0	0	-0.560516	-0.750536	-0.501594	-0.428659	0.512021	0	-0.585226	-0.562827	0.554313	-0.738703	-0.563292	0	-0.456239	-0.575115
COLLER_MYC	0	-0.577925	0	-0.488846	0	-0.602762	-0.477597	-0.458813	-0.5147	0	-0.462847	0	0	0	-0.652561	0.522365	0.686832	0.666292	0	0.527597	0	0.655248	0.37413	-0.459812	0	0	0	0	-0.642094	-0.527007	0	0	-0.554905	-0.802793	0	0.546807	0	0	0	-0.488608	-0.700375	0	-0.612112	0.483744	-0.409327	-0.585149	0.493647	0	-0.685442
MOREAUX_TACI_XG_13	0.498736	0.773958	0.555514	-0.432468	0	-0.522125	0	0	0	-0.535448	0.346095	-0.695081	0	0	0	0	0	-0.884882	0	-0.423385	0	0	0	0	0.486291	0.386655	0	0.493789	0	0	0.577495	0	-0.641419	0	-0.569604	-0.586644	0.485891	0	0.416476	0	0.44915	0	0	0.547724	0.395219	0	0	-0.365436	0.506589
UVC_XPCS_8HR	0	0	0	0	0	0	0	0.332818	-0.593399	0.495332	0	0	0.319353	0	0	0.446834	0.492996	0.391714	0.451686	0	0	0.398255	0.38282	0	0	0	0	0	0	0	0	-0.62606	0	-0.686376	-0.566151	0	0	-0.6951	-0.76055	0	0.447057	-0.548163	0.321934	0	0.378707	0.505987	0	0	0
AS3_FIBRO	0	0.604208	-0.519603	0	0	0	0	-0.374877	0	0	-0.720701	0	-0.731739	-0.478614	0	0	0.472457	0	0	-0.627393	0	0	0	0.494405	0	-0.574622	-0.642479	0	0	0	-0.435415	0	0	-0.532422	0.648886	0	0	0	0.533791	0.53286	0.552146	0.528635	0	-0.398586	0	0	-0.815432	-0.449587	0
TAKEDA_NUP8_HOXA9_10D	0	-0.723795	-0.72274	-0.773949	-0.698414	0	-0.613179	0	-0.626898	0	0	0.845699	0.779632	0	0.984839	0.871763	0.909768	0	0	0.720823	0	0.597488	0	0	0	0	0	0	0	0.881622	0	0	0	0	-0.723776	0	0	-0.795397	0	-0.730624	0	0	0	0	0	-0.638588	-0.857172	-0.604245	0
CALRES_MOUSE_NEOCORTEX	-0.632341	0	0	0	-0.573889	0	0	0	0	-1	-0.564059	0	0	-0.549491	-0.768409	0.593146	0	-0.700313	0.705089	0	0	-0.424035	-0.682091	0.477649	-0.566587	-0.622596	0	0	0.448138	0	0	0	0	0	0.438199	0	0.465555	0	0	0	0	0	0	0.638185	0.720038	0.687457	0	0.431997	0
HDACI_COLON_BUT2HRS	0	0.489476	0	0	0	0.476539	0	0	-0.565034	0.462706	0.473959	-0.833111	0	0	0	0	0.601679	0	0.36071	-0.560364	0	0	0	0	0	-0.496652	0	-1	-0.44567	0	0	0	0	0	0.483692	0	0.435126	-0.451781	0.562322	0	0.481633	-0.725203	0.729039	0	-0.434144	0	0.830258	0	0.59996
FSH_OVARY_MCV152	0	0	0.382276	0.536348	0.351172	-0.556702	-0.388797	0	0.511554	0.540406	0.661558	0	0.662631	0.602208	0	0.563308	0.553693	0.48158	0.929846	0.815231	0.431291	0	0	0	0	0	0	0.488043	-0.753738	0.478504	0.502758	0	0	0	0	0.636217	0	0.547979	0	0	0.508519	0	-0.725544	0.464025	0	0.371418	0	0	0
LI_FETAL_VS_WT_KIDNEY	0	0.463667	-0.544933	0.638474	0	-0.473932	-0.459722	0	0	-0.663199	0.511265	0	0	0	0	0	0.44863	0	0.475957	0	0	0	0	0	0.422857	0.45932	0.574897	0	-0.517186	0	0.533941	0.402079	0.490913	0.545362	0	0.539745	-0.593079	0.37623	0	0	0.442552	0.673444	0	0	0.399565	0.41677	0.549896	0.646531	0
SARCOMAS_SYNOVIAL	0	0	-0.363907	0	0	-0.437963	-0.634025	0	0	-0.544492	-0.517096	0	0.610174	-0.543484	0	-0.64893	0	-0.72699	0.370798	-0.399216	0	0	-0.385901	0.576415	0	0.537572	0	0.583295	0.64181	0.637785	0.87706	0	0	0.624802	-0.701869	0	0	0.59851	0	0.701415	0	0	0	0.3505	0	0	0	0.496052	0
GH_EXOGENOUS_LATE	0.63523	0.8672	-0.53138	0.697031	0.48667	0	0	-0.920808	0.558024	0	0	0	-0.823371	-0.693253	0.690371	0	0	0.640675	0	0	0.460893	0.62358	0.586685	0	-0.667094	-0.731206	0	0	0	0	0	0	0	0	0	0	0.659474	0.642127	0	0	0.63653	0.678009	-0.730418	0	0	0.657342	-0.670534	0	-0.831621
HDACI_COLON_BUT24HRS	-0.549964	0	0	-0.688364	0	0	-0.498774	0	0	0	0	0.270099	0.314018	0	-0.393891	0	0	0.335824	0.45743	0.43557	0	0	0.354938	0	0.333079	0	0	0	-0.421871	-0.645165	0	-0.73531	-0.735259	-0.732116	0.505004	-0.408168	0.419062	0.358559	0.352515	0.421707	0.319992	0.40089	0	0	0.380511	0.449355	0.385432	-0.551771	0.601759
CANCERDRUGS_PROBCELL	0	0	0.512306	0	0	0	0	0	-0.57843	0	0	0.894612	0.567486	0	0	0.475902	0	0	0	-0.513272	0	0.603992	-0.507027	0	-0.53949	0	0.940701	0.56714	0	0	-0.666226	-0.483713	0.535713	0	0.600239	0	0	-0.467783	-0.792587	0	0	0	0	0	0.787286	0	0	0.569523	0
LEE_ACOX1	-0.594267	-0.700355	0.604727	-0.599862	-0.554667	-0.435222	0	0	-0.652823	-0.587618	0.696224	0	0	0	0.739931	0	-0.599181	0.524966	0	0	0.617351	0.33712	0	0	-0.629651	-0.584246	0	0	-0.742285	-0.61248	-0.790211	0	-0.502814	0	0	0.62653	0.753635	0.490573	0	-0.50267	0	0.516635	0.861826	0	0	0	0	0	0.82614
XPB_TTD-CS	0	-0.93127	0.405356	-0.603322	0	0	0.503114	0	-0.606961	0.743655	0.767852	0.707205	0.665726	0	0	-0.618162	0	-0.879515	0	0	0.630478	0	0	0.838417	0.800199	0.711346	-0.592818	0.749497	0	0	0	0	0	0.747543	0	0	0	0.814219	0	0.760648	0.888397	0.648853	0.69121	0.633304	0.56887	0	0.642955	0	0
JNK	0	-0.562642	0	0.384855	0	0	0	-0.607326	0	0	-0.709996	0.68349	0.498758	0	0	0	0.55727	0	0.36167	0	-0.547441	0	0	0	-0.582529	0.565811	0.545943	-0.685245	0	0	0	0	0	0	0.564151	0	0.50928	0.551935	0	0	0	0	0	0	-0.498334	0	-1	-0.367014	0
CITED1_KO_HET	0	0.49672	0.514311	0.463098	-0.676097	0	0	0	0	0	0.52695	0.503312	0	-0.58302	0.442855	0	0	0	0	0	0.548115	0	0	0.570543	-0.540473	0.449677	0	0.511126	0	-0.470077	-0.582484	-0.454625	-0.410893	-0.449861	0	0	0	0	0.377958	-0.487869	0	0	0	0	0	0	-0.603184	0	0
AGED_MOUSE_RETINA_ANY	0	0	-0.456638	0	0	0.519952	0.456367	0	0	0.484287	0	-0.713458	0	0	0	-0.748988	-0.582804	0	0	0	0.597911	0.829607	0.365433	0.576762	0	0	0	0	0.908091	0	0.521058	0.571689	0.672638	0	0	0	0	0	-0.359313	0	0.557593	-0.768699	-0.783378	0	0	0	0	0	-0.717795
HDACI_COLON_SUL16HRS	0	0.565552	0	0.486848	0.558203	-0.603203	-0.725528	0	0	0	-0.687758	-0.709228	0	0.65473	0.5369	0	0	0	0	0.706609	0	0.555662	0	0	-0.749425	-0.95006	0	0	0	-0.865388	0	-0.669664	-0.711186	-0.846388	0	0	0	-0.673995	-0.711633	0	-0.606188	0.6944	0	0	0.479653	0.635788	0.800037	0.72473	0
MYOD_NIH3T3	0.487442	0	0	-0.800467	-0.534714	0	0.481545	0	0	0	0	0.596935	0	0	0	0	-0.622868	-0.516662	-0.653813	-0.793893	-0.518855	0	0	0	-0.56155	0	0	0	0	0	0	-0.58788	-0.484376	0.707277	0.604596	-0.792901	0	0	0	0	0	0	0	-0.501734	0	-0.766331	-0.699929	-0.634206	0
CALRES_MOUSE	0.55979	0.49949	-0.488247	0	-0.399269	0.847445	0	0	0	0.660234	0	0	0	0.576181	0	0.621102	0.720475	-0.60767	-0.510145	0	0	0	0.422248	0.776845	0	-0.65955	0	0	0.464404	0	0	0	0	0	-0.56322	-0.629253	-0.655587	0	0	0	-0.586326	0	0.719534	-0.637479	-0.431904	0.485865	0	0	0
CALRES_RHESUS	0	-0.400968	0	-0.702407	0	0.567077	0	0	0.680616	0.601451	0	-0.54459	0.402405	0	0.547633	-0.600214	-0.86751	0.659488	0	0	0.606303	0.629876	-0.401159	0.584958	0	0	0	0	0	0	-0.734513	-0.682634	0	-0.646244	0.629119	0.491308	0.576329	0	0	0.459385	0.628068	-0.567014	0	-0.468219	0	-0.531149	0.527781	0.482105	-0.688041
HTERT	0.499945	0.580702	0.563234	-0.381702	0.523505	0.536827	0	0	0	0	0	-0.596417	-0.710121	-0.774873	0	0	-0.65896	0	0	0	0	0	-0.619599	0	0.661265	0.690632	0.88275	0	-0.723874	-0.615724	0	0.818488	0	0	0	-0.537665	0	0.755823	0	0	0	0	-0.609416	0	0	0	0	0	0
DER_IFNB	0	0	0	0.565543	0.764452	-0.746506	-0.752781	-0.423661	0	0	0	0	0.638317	-0.449458	-0.599433	-0.635659	0.624107	0	0.501884	-0.517332	0.451676	0	0	0	0	0	0	0	0	0.410476	0	0	0.597087	-0.468475	-0.526019	-0.5144	0	0	-0.426012	-0.564718	0	0	0	0	-0.410613	0.453951	0	0	0
PARP_KO	0	-0.561044	0	0.478488	0.437179	0	0	0.56461	0.611029	0	0	0	0.591129	0	-0.740314	0	0.463927	0.555864	0.516071	0	0.505982	0	0.582803	0	-0.672302	-0.581525	0.488415	0.530484	0.590292	0.737987	0.493446	0	0	0.700926	0	-0.7848	0	0	0.537911	0.535573	-0.775814	-0.535861	0	0	-0.51365	0	0.47846	0.626627	-0.65678
BCNU_GLIOMA_NOMGMT_48HRS	0	-0.65787	-0.569262	-0.545514	0	-0.632622	-0.563846	0.616004	-0.644933	0	0	0	0.58511	0.400347	0.40862	0.53655	0	0	-0.485751	0.489995	0	-0.595387	0	0	0	0	0	0.407113	0.512092	0.365368	0.5229	0.510307	0.47312	0.783854	-0.772133	-0.698966	-0.659966	-0.721398	-0.684124	0	0	0	0.577153	0.426618	0	0.534634	0.73895	0.510182	-0.58445
CORDERO_KRAS_KD_VS_CONTROL	0	0	-0.361704	0.357863	0	-0.471724	-0.447149	-0.539809	-0.491231	0.371495	-0.429852	0.425277	0	0.703673	0.655945	0.56508	0	0.485502	0.735309	0.619856	0.471625	-0.39044	0	0	0	-0.48013	-0.432485	0.648163	-0.586583	0	0.698612	0.75731	0.499758	0.740795	0	0.392313	0.722155	0.43052	0	0.587736	0	0.393275	0	0	0.52759	-0.443525	-0.510833	-0.708953	0
POD1_KO	0	0	0	0.428074	-0.413964	0.557868	0.584243	0	0.568272	-0.256047	0	0.353144	0	-0.213705	-0.268041	0	0	0.490858	0.494772	0	0	0	0.59974	0.34767	0	0.502103	-0.444893	0	0	0.638085	0	0	-0.549205	-0.491241	0	0	-0.469	-0.495004	0	0	-0.331893	-0.329631	-0.492135	0	-0.462238	-0.298847	-0.38519	-0.500482	-0.633047
ET743_SARCOMA	-0.578185	0	0	0.533733	0	0.35985	0	0.486257	0.505963	0	0	-0.68414	0	0	-0.656254	0.525788	0.471477	0.575472	0.64179	0.654207	0	0.356894	0	0	0.538808	0	0	0	0	0	0	0	-0.925612	0	0.614664	0.507447	0.547592	0	0.568368	0.492338	0.51327	0	0.640701	0.364824	0.498197	0.585906	0	0.55181	0
GH_HYPOPHYSECTOMY_RAT	0.746478	0	0	-0.83265	-0.472744	0.494632	0.719809	0.628795	0	0	-0.525787	-0.688817	-0.623883	0	0	-0.688999	-0.640463	0	0	0.662819	0.803479	0	0.479688	0.888033	0.598687	0	-0.404542	-0.6995	0	0.509286	0	0	0	0	0	0	0	0.691642	0	-0.519071	0.683599	0	0	-0.786026	-0.777117	0	0	0.7131	-0.632357
CREB_BRAIN_8WKS	-0.419331	0	-0.519193	-0.444364	0	-0.520965	-0.496738	-0.532148	-0.643963	0.525868	0.503602	0	0	0.616208	0.562907	-0.631834	0	0	0	-0.611574	0	0	0	0.50396	0	0	0	0.713845	0.589334	0	0	0	0	0	0	0	0	0	0	0	-0.798135	0	0.461754	0.478136	0.698346	0.547034	-0.357545	0	0
HDACI_COLON_SUL	0.509103	0.590345	0	0.589054	0	0	-0.540378	0.507423	0	0.58894	0	0	0	0	0.649716	0	-0.62519	0	0	0.839659	0	0.541422	0.753841	0	0	0	-0.588179	-0.817842	0	-0.660973	0	-0.944316	-0.830317	-0.804673	0	0	0	0.497042	0	0	0	0	0.871401	0.654541	0.482387	0.661363	0.65712	-0.643828	0
ET743_RESIST	0.666365	0	0	-0.706171	-0.476631	-0.394442	-0.538008	0.454533	0	-0.725417	0	-0.540542	0	-0.838267	-0.60294	0	-0.780758	-0.589069	0.691472	0.660037	0	0	0	0	0	0.621631	0.703239	0	0.489958	0	0	0	0.728877	0.518273	0.630797	0	0.515747	-0.80812	0	-0.656694	0	0	0	0.431134	0	0	-0.520023	0	0
GAMMA_UNIQUE_FIBRO	0	0	0	-0.684502	0	0.552663	-0.430782	0	0	-0.538998	0	0	0.606893	0	-0.733187	-0.771211	0	0	0	0	0	0.555474	0	0.596897	0.550976	0.603636	0.582583	-0.526176	0	0	0	0	0	0	0	0	0.600302	-0.788733	0	0	0.472416	-0.56154	-0.630556	0	-0.600001	-0.553332	-0.698194	0	0.893395
KIM_TH_CELLS	0	0	-0.610346	0	-0.471277	0	0	0.390936	0	-0.405291	0	0	0.542852	-0.538853	-0.478963	-0.471705	0	-0.713898	-0.462928	0	-0.590107	0	-0.709879	-0.617346	-0.470086	-0.671392	0	0	-0.660609	-0.615268	-0.515661	-0.378693	0	0	-0.505239	-0.440621	0	-0.637253	0	0	0	0.545168	0.482764	0	0	0	0.750672	0	0
UVC_TTD_4HR	0	0.508174	-0.583811	0	-0.618314	0	0	0	0	0.392786	-0.476059	0	0	0.422281	0	0.41604	0.575266	0.538119	0	0	0	0.517497	0.396593	0	0	0	0	0.535734	0.395979	0	0	-0.695066	-0.875045	-0.814291	0	0	0	0	0	0.444547	0.441874	-0.715856	0.551999	0	-0.416301	0.491889	-0.67826	-0.751653	0
TAKEDA_NUP8_HOXA9_16D	-0.518378	0	0	-0.579424	-0.590811	0	0	0	0	0	0	0.609528	0	0.506259	0	0.606931	0.679737	0	0.41843	0.550734	0	0	0	0.673033	0	0.688023	0	0	0	0.895355	0.7309	0	0	0.632263	0	0	-0.729149	0	0.515871	0.633765	0.543132	-0.503502	0.704505	-0.378543	-0.514251	0.455906	0.530978	-0.389039	0
HBX_NL	0	0	0	0	0.643486	0	-0.629743	-0.329616	0	0	0	0.539078	0.489358	0	0	0	0	0	0	0	0.641392	0	0.539	-0.526971	0	-0.397919	0	-0.495379	0	0	-0.517303	-0.443644	-0.433571	0	0	-0.404681	0	0.559542	0	0.585613	0	0	0	0	-0.73815	0	-0.499387	-0.711866	0
ADIP_VS_FIBRO	-0.511568	0	0.561535	0	0	0	-0.471832	0	-0.981096	0.467937	0	0	0.544294	0.498868	0	0.528099	0.589347	0	0	0.525819	0.459224	0	0	-0.688158	0.529924	0	0	0	0	0	0	0	0	0.542583	0	0.384493	-0.793549	0	0	0	0	0.381665	0	0	0.442933	0	0.301033	0	0
NELSON_ANDROGEN	0.796684	0	0	0	0	0.616083	0.635425	0.38222	0	-0.611273	0.559794	-0.479796	0	0	0	0	0.62086	0.426324	-0.623024	0.593755	-0.801839	-0.632878	-0.760257	0	-0.387573	0	0	0	-0.423728	0.500009	0	0.768796	0.366075	0	-0.5941	-0.568246	0	0	0	0.523297	0	0.410824	0	0	0	0	0	0	0.447674
HOGERKORP_CD44_TEMPORALLY	0.601373	0.818419	0	-0.585992	-0.406406	0	0	0.629684	0	-0.457396	0	0.858696	0.527681	0.646053	0	0	-0.693128	0.913323	0	0.661792	0.582032	-0.671161	-0.658208	0	0.799193	-0.450636	0	0.641205	0	0	0	0	0.759254	0	-0.604928	0	-0.701295	0.520058	0	0	0.653294	0	0	0	-0.418843	0	0	0.86575	0
UVC_TTD_8HR	-0.764748	0	-0.569085	0	0	-0.4953	0	0.333286	-0.672484	0	-0.507676	0	0	-0.710822	0	0	0.634257	0	0	0.350364	0.483604	0	0	0.444021	0	0	0	0	0	0.46976	0	-0.659533	0	0	0	0.365374	0.370853	0	0	-0.627505	0.495059	-0.420793	0	0.396206	0.3347	0.562442	0.337349	0	0
CMV_UV-CMV_COMMON_HCMV_6HRS	0	0	-0.493407	0	-0.455978	0.535285	0	0	0.409616	-0.542866	0	-0.624448	-0.599093	-0.635524	-0.547667	0	0	0	0.535302	0	0.789855	0.670827	0.611312	0	0	0.513231	0.472309	-0.515456	0	0	0	0	0	-0.811975	-0.784129	0	0	0.381933	-0.90042	-0.774456	0	0	0	0	0	-0.628827	0	-0.425624	0.475209
CMV_HCMV_TIMECOURSE_8HRS	0.597784	-0.587488	0.461766	0	0	0	0	0.577405	0	0	0	0.540666	0.514574	0.677067	-0.568448	0.719095	0.770011	0	0	0	0.656616	0.794459	0.760146	0	-0.479861	-0.741179	0	0.573611	0.643985	0	0.712542	0.600408	0.659416	0.629604	-0.712969	-0.668951	0	0.406777	0	0.508264	0	0.609392	-0.674425	-0.606218	-0.473846	-0.454613	0	-0.644061	0
FLECHNER_KIDNEY_TRANSPLANT_WELL_PBL	0.427928	0	0.472445	0	0.426246	0.401459	0.286884	0.616789	0.847281	0	0	0	0	0	-0.739405	0	-0.699923	-0.684764	0	-0.655058	0	-0.454356	0	0	0	0	-0.728627	0	0	-0.896783	0	0	0	0	0.803082	0	0.726169	0	0	0.977089	0.964946	-0.516407	0	0	0	0.401599	-0.713089	-0.735967	0
DNMT1_KO	0.74931	-0.781275	0	0	0.609538	-0.519842	-0.859957	-0.431754	0.441804	0	-0.53721	-0.562788	0.507608	0.551639	0.466124	-0.6476	0	0	-0.560053	0	0.501823	-0.557862	0	0	0	-0.73016	0.520562	-0.470499	-0.833693	-0.511634	0.384019	-0.587923	-0.415909	0.455984	-0.522007	0	0.587201	0.631271	-0.64809	0.415399	0	0	0	0	0	0	0.499302	0	0
TPA_SENS_EARLY	0	0	0	0.558897	-0.260618	0	0	0	0.501612	0	0.438904	0	0.543437	0	-0.563474	0	0	0.458093	0.721714	0.420807	0	0.595388	0.51341	0.479215	-0.55114	0	0	0	-0.512456	0.517268	0	0	0	-0.429999	0	0.442519	-0.493466	0.601719	0.478285	0	0.385792	0.769057	0.426176	-0.41385	-0.539683	-0.358995	0	-0.375417	0
CMV-UV_HCMV_6HRS	-0.439351	0	-0.555405	0	0.456587	0.301426	-0.435934	-0.53183	-0.298972	0	0.603539	0.444596	0	0	0.547531	0	0.396623	-0.469335	0.507544	0	0	0.615054	0.520463	0.469364	0	0.451035	0.36975	0	0	0	0.482321	0	0.536658	0	0	0.461893	0	-0.362668	-0.6668	-0.330278	0.424018	-0.561116	0	0.481421	-0.714257	0	0	-0.467555	0
HDACI_COLON_CURSUL	0	0	0.573099	-0.523949	0	0	0	0	0	0.753578	-0.901661	0	0	0	0.609802	0	0	0	-0.632928	0.840684	0	0	0.649548	0	0	0	-0.424863	-0.822642	-0.426811	0	0	-0.709997	-0.60417	0	0	0	0	-0.607436	-0.566183	0	-0.546601	0	0	0	-0.68744	-0.458337	0	0	0.889717
GRANDVAUX_IRF3	0	-0.614212	0	0.437913	0	0	0	0.377423	0.67858	0.730837	0	0.420552	-0.53717	-0.94084	0.571363	0.485115	0.440438	0	0	-0.897175	0	0	0	0	0.484433	0	0.450445	0	0	-0.660838	0	0	0	0	0	0.733534	0	0	0	0	0	0	0	-0.421942	0	0	0	0	-0.788161
HDACI_COLON_SUL48HRS	0	0	0	0.517942	0.767356	-0.626463	-0.704481	0	0	0.51605	-0.718647	0	0	0	0	0	-0.663523	0.590566	0	0.687409	0.524823	0	0	-0.915789	-0.632672	0	0	-0.743328	-0.756546	-0.587622	-0.803779	-1	0	-0.70912	0	0	0	0.474688	-0.670303	0	0	0.634654	0	0.6719	0	0.485489	0	-0.568078	0.735668
DIAB_NEPH	0	0.363811	-0.442358	0	0.368836	0	0	0	0.526559	0	0	0.409607	0	0	0	0	-0.546283	0	0.381761	-0.455272	0.34764	0	0	0	0	0.585445	0	0.592981	0	0.394951	0.521894	0	0	-0.599715	0	0	0	0	0.44577	0.735723	0	-0.486751	0	0.27717	-0.383365	0	0.451639	0	-0.621757
KENNY_WNT	0	0	0	0	0	0.490447	0	-0.541539	-0.416981	0	0	0.470236	0	-0.585872	0	-0.43462	-0.754677	-0.451926	-0.586384	0	0	-0.421281	0	0.81367	0	0.616122	0	0	-0.475191	0	0	-0.461536	0	-0.42644	0	0	0	-0.515571	0	0	0	0.603958	0	-0.533487	0	0.696869	0	-0.737311	-0.377181
KANNAN_P53	0	0.601702	0	0	0	0.644636	0.508789	0.32751	0.570532	0.446781	0.336557	0.654388	0.426975	0	0	0	0	0	0	0	0.449223	0.423799	0	0.494488	-0.553526	-0.353434	-0.535144	0	0	0.42216	0	-0.584484	0	0	0.486703	0.687581	0	0.425546	-0.547661	0.445354	0	0	-0.439299	0.498392	0	0	0	-0.46182	0.41307
HDACI_COLON_TSA2HRS	0	0.38627	0	0	0.383032	0.293996	0	0	-0.625323	0	0	-0.707271	0	0	0.306991	0	0.453006	0.557058	0	0	0	0.361431	0.337272	0	0.326978	0	0.519327	-0.79884	0	0	0	0	-0.581169	0	0.404767	0	0.463793	0.405709	0	0	0	-0.534751	0	0	0	0	0.450583	0.398345	0
PITUITARY_FETAL	0.865895	0.538444	0	0	0	0	0	-0.598735	0	0	0	0.727479	0	-0.663862	0	0	0	-0.606991	0.838812	0.623722	0	0	-0.659348	0.808428	0	0	0	0.71386	0	0.787024	0	0	0.627189	0	0.413769	0.761232	0.746379	0	0.576632	0.744266	0.760044	-0.705209	0	-0.934044	0	0	0.708459	-0.626233	0
TPA_RESIST_LATE	0	0	0	-0.47277	-0.58737	-0.447397	0	0	0	-0.686657	0	-0.598892	0.602313	0	0.749129	0.606157	0.55687	0	-0.574161	0	0.738145	0.691662	0	0	0.665066	-0.762371	-0.463359	0.613442	-0.49843	-0.719411	-0.674612	0	0	0	0	-1	0	0.722565	0	0.793491	0	-0.413197	-0.712082	-0.561386	-0.863337	-0.498841	0	0	0
BRACX	0	0	0	0	0	0	0	0	0.577264	0	0	0	0	-0.426381	0	0	0.471278	0	-0.768608	-0.7735	-0.475675	-0.582399	-0.891049	0.618193	-0.566875	0	0	-0.675326	0.848804	-0.62237	-0.619277	-0.359237	-0.474491	0	0.852971	-0.368491	0	0.715627	0.626221	0	0	-0.558101	-0.546847	0	0.554971	-0.777524	0	0.80554	0
CHEOK_MP	0	0	0	0	-0.645042	-0.341861	-0.470733	0	0	-0.735685	-0.900833	0	0	0	0	-0.612048	0	0.679491	-0.43153	-0.551844	0	1	-0.460402	-0.705489	-0.672812	-0.388528	0	-0.543055	0	0	-0.472775	-0.569257	-0.495465	0	-0.553305	-0.543003	-0.626503	0.662789	-0.538659	0	0	0	-0.639939	-0.435824	0	0	-0.607406	0	-0.401065
NAB_LUNG	0	-0.549682	0.341418	0.332495	0.565588	-0.534775	-0.488435	0	0	-0.655073	0	0.482675	0.643241	0	0	0.475173	0	0.621492	0.418375	0.638803	0	-0.511238	0	0	0	-0.675504	0	-0.423877	-0.411859	0	0	-0.587306	0	0	0.576531	0	0.447436	0.813107	0	-0.383539	0	0.400862	0.537419	0.650705	0.488917	0.662262	0	0	0.801613
CMV_HCMV_TIMECOURSE_20HRS	0	-0.608633	0	-0.602006	0	-0.522956	-0.491024	0.474617	0	0	-0.425545	0	-0.445251	0	0	0	-0.483186	0.522136	-0.521954	0	0	0.899028	0.953558	0	0.304479	0.495141	0	-0.529983	-0.33174	0	-0.584001	0	0	0	0	-0.406504	0	-0.426912	0	0.55385	-0.631785	0	0	0	-0.582438	0	0	0	-0.653558
INSULIN_ADIP_INSENS	-0.399218	0	-0.653049	-0.673475	0	0	-0.459632	0.591206	0	0	0	0	0	0	0	0	0.362112	0.438076	0	0.69164	0	0	0.837577	0	0.648776	0	0.610049	0	0	0	0	0	0	0	0	-0.373626	0	-0.393258	0	0	0.557082	0	-0.382259	0	-0.783933	-0.672933	-0.449612	0	-0.428137
TPA_RESIST_MIDDLE	0	-0.564808	0	0	0	0	0	0	0	0	0	-0.534853	0	-0.682941	0	0	0	-0.618132	-0.568163	-0.719277	0	0.672604	0	-0.619377	0.588123	0	-0.475202	0	0	-0.616435	-0.5768	-0.395768	0	0	0.590662	0	0	0.482284	-0.436643	0.641853	0	-0.569138	-0.611761	0	-0.761707	-0.638704	0	-0.66123	0
CMV_HCMV_TIMECOURSE_16HRS	-0.397497	-0.608535	-0.545343	-0.533966	-0.602529	0	0	-0.42908	0	0	0	-0.510163	0	-0.618342	-0.679707	-0.707141	0.512561	0.614161	0	0.591459	0	0.659325	0	0	-0.649263	-0.620232	0.586701	0	-0.752311	-0.548731	-0.639335	-0.713273	0	-0.558599	0	-0.625944	0	-0.568638	0	0	-0.763389	0.55209	0	-0.501247	0.520261	-0.521522	0	0.771192	0
BCRABL_HL60_AFFY	0.555255	0.369886	-0.672078	0	0	-0.700091	0	0	0	0	-0.627752	-0.73038	-0.759873	0	-0.694075	0	-0.776858	-0.86691	0	0	0	0.512801	0.732275	0	-0.604307	0	0.50241	0	0	0	0.880437	0.869864	0.888866	0.970411	0	0	0	0	-0.454116	0	0	0.795919	0	0	0.513822	0.57532	0.514078	0.626394	0
ET743_HELA	0	0	0	0.509769	0	0	-0.496318	0.831779	0	0	0.506338	0	0.594703	-0.909798	0.489311	0	0.565716	0	0.461284	0.743549	-0.563217	0	0	0	0	0	0.618225	0	0	0	0.431454	0.641816	0	0	-0.802965	-0.592135	-0.71191	0	0	0.440224	0.470676	0.657088	0.639952	0	0.55706	0.604526	0.635672	0.519465	0.653486
ADIP_HUMAN	0.591882	0	0	0	-0.451401	0	0	0	-0.706551	0	0.768823	-0.486657	-0.650696	0.484533	-0.491183	-0.530218	0	-0.645587	0	0	0	0.398735	0	0	0	0.738422	0.622213	0	0.748915	0	0	0.639448	0	0	-0.436601	0	0	0.601274	-0.703519	-0.365176	-0.780563	-0.600351	0	0	0.682349	0.532338	0	-0.472201	0.760896
ET743_SARCOMA_72HRS	-0.495206	0	0	0.514992	0	0.327999	0.306366	0.441168	0.503581	0.454791	0	0	-0.562319	0.474842	0	0.385124	0	0	0.505246	0.501838	0	0	0	0	0.490354	0	-0.745059	0	0	-0.642426	0	0	-0.932886	-0.797015	0.564704	0	0.490454	0	0	0	0.463264	0	0.532947	0.336725	0.566532	0.602393	0	0	0
HADDAD_CD45CD7_PLUS_VS_MINUS	0.412737	0	0.543461	0.598267	0	0.589774	0	0	0.722131	0	0	0	0	0.612094	0	0.478202	0.623603	0.499315	0	0	0	0	0	-0.687419	0	0.437374	0	0	-0.451691	-0.6118	-0.547619	-0.554808	-0.561578	-0.513532	0.513798	0	0	0	0	0	0	-0.568988	0.536642	-0.542879	-0.714547	-0.691486	0	0	0
ABRAHAM_MM_VS_AL	0	0	0.559717	0	0	0	0	-0.645664	0	0	-0.416062	0	-0.420392	-0.482983	0	0.603699	0.893979	0.430223	0	0	0	-0.477635	0.380794	0.545046	0.675525	0.542132	-0.605724	0	0.448339	0.676724	0	0	0	0	0	0	-0.372683	-0.415979	0	0	0	0.654928	0	0	0	-0.556562	0	0.67877	0
NI2_MOUSE	0.486974	-0.451959	0.590469	0	0.471658	0.486348	0.524305	0	-0.642494	-0.929634	0	0	0.445285	-0.540581	0	0	0.422576	0	0	0	0	0.507627	0	-0.654593	0.739531	-0.779868	0.570453	0	0	0	0	0	0	0	0	0.775878	0.799636	0	-0.60369	0.465488	0.817656	0	0.551417	0.360489	0	0	-0.447297	0	0
CIS_XPC	0	-0.555202	0	-0.546146	-0.397336	-0.315983	0	0	-0.438556	0	-0.453374	0	-0.434302	0	0	0	0	0	0	-0.634901	0	0	0	0.757553	-0.602047	-0.400549	0.453959	0	0	0.595114	0	0	0	0.564643	-0.458115	-0.485642	0	-0.551554	0	0.882687	0.693244	0	0.67625	-0.425181	-0.413134	0	0	-0.534981	0
ADIP_VS_PREADIP	0.256904	0.423484	0.351311	0.448443	-0.38751	0	-0.69248	0	-0.866192	0.511443	0	0	0	0.437165	0.373765	0.375373	0.418909	0	0	0.542538	0	0	0.309838	0	0	0	0	0	0.416245	0	0	0	0.43074	0	0	0	-0.830251	0	0	0.330551	0.437916	0	0.655382	0.366979	0	0	0	0	0
GAY_YY1	0.276892	0	0.359684	0.49481	-0.344791	0.35632	-0.370606	0	0	0	0	0	0	0	0	-0.544619	0.595517	0	0.501138	-0.407343	0.264818	0.428777	0	0.477407	-0.578136	0.591537	0	0.541263	0.44624	0.718259	0.700225	0.670517	0	0.617437	0	0	0	0	0	0.607589	0.568571	0	0.458139	0	0	0.32339	0	0	0
HYPOPHYSECTOMY_RAT	-0.487978	-0.591091	0.491643	0.626124	0	-0.529595	0.404525	-0.627549	-0.433719	0	0	-0.452556	0.342905	0.43219	0	-0.63115	-0.328534	0	0.728504	0	-0.372294	0	0	0.517974	0.579464	0.591994	0	0.545884	0	0	0.535094	0	0.463991	0.518337	-0.455494	0	0	0	0	-0.43142	0	0.672288	0.8921	0.548544	0.553531	0	-0.548879	-0.578748	0
HEARTFAILURE_ATRIA	0	0.550635	0	-0.424909	0	0.580222	0	-0.542602	0	-0.461282	-0.423758	-0.588183	0.580902	0	0.490968	0.6333	-0.587312	0.57351	0	-0.78055	-0.480994	0	0	0	0	-0.392317	0	-0.481048	0	0.603776	0	0.58328	0	0	-0.399641	0.489013	0.697263	0.451011	0.609284	0.503921	0	-0.442877	0	-0.57482	0	-0.359579	0.55573	0	-0.625298
MA_ATRA_EMP	-0.78219	0	-0.742651	0	0	0.56754	0	-0.566238	-0.671807	0	0	0.52337	-0.585374	0	0	0.661452	0	0	-0.477937	0.492014	0	-0.540491	-0.409841	0	0	0	0	0	-0.432541	-0.659741	0.469518	-0.949354	0	0.714846	0	0.650037	0	-0.528462	0	-0.559551	0	0.578147	0	-0.568524	-0.636777	0	0	-0.611996	-0.514909
UVC_TTD_ALL	-0.430702	0.483172	-0.583898	0	-0.578461	0	0	0	0	0.370611	-0.416721	0	0	0.30492	0	0.399431	0.512674	0.388239	0	0	0	0.463028	0.400888	0.337167	0	0	-0.392531	0.409482	0	0	0	-0.664372	-0.781651	-0.747198	0	0	0	0	0	0.349545	0.422101	-0.663138	0.448313	0	0	0.501423	0	-0.757784	0
POMEROY_MD_TREATMENT_GOOD_VS_POOR	0	0.725499	0.732211	0.608344	0	0.433112	0	-0.474889	0	-0.472468	0	0	0	0	0	0	0	0	0	-0.504679	0.847965	0.69049	-0.462675	-0.608301	0	0.583581	0	0	-0.497108	-0.501636	0	0	0	0	0	-0.497169	0.501248	-0.527652	0	-0.723687	0.512973	0.790065	0	0	-0.594207	0	0.638961	0	-0.645278
WANG_HOXA9_VS_MEIS1	0	-0.618418	-0.610458	-0.531161	-0.574498	0	0	0	0.401478	0	0	0.869682	0.801789	0	0	0	0.44636	0.54551	0	-0.730929	0	0	-0.6182	0.667701	0.532242	0.727434	-0.563222	0	0.701059	0.572824	-0.468525	0	0.882312	0	0	0	0.445354	0	0.511993	0	0	-0.597716	0	0	0	-0.532673	-0.763567	-0.537385	0
HOHENKIRK_MONOCYTE_DEND	-0.440576	-0.280622	0	0	0.424725	0.502013	0.491524	-0.694528	0	0.542465	0.634076	0	0	0	0	0	0	0	0.461106	0	0.46166	0.371166	-0.434169	0.588353	0.679045	0.745376	0	0	0.649115	0.929593	0.842918	0.876469	0.828171	0.829044	-0.601063	0	0	0	0.702444	0.464877	0	0	0.404003	0	0	0	0	-0.449356	0
MANALO_HYPOXIA	-0.335188	0.314725	-0.482533	0.381984	-0.446428	0	0	0	0	0	0.48914	-0.571355	0	0.529428	0	0.501303	0.529112	0	0.472546	0	0.335603	0	-0.481374	0.550679	0.506312	0.50842	0.425771	0.626015	0.498621	0.489667	0.645493	0.571332	0.511413	0.61763	0	0.52673	0.595483	0.56155	0.456745	0	0.481979	0	0.611182	0	0.568074	0.481534	0.573759	0.409829	0.638227
SHIPP_DLBCL_CURED	0	0	0	0	-0.582486	-0.66194	0	0	-0.435517	0	0	-0.65314	0	0.539403	-0.619529	0	0	-0.82089	-0.548823	-0.854867	0.49779	0	-0.548147	0.386744	-0.535892	0	0.608974	0.422987	0	-0.700853	0.535084	0.533865	0	0.637495	0	0	0.627955	0	0	0	0.523954	0	-0.52269	-0.520238	0	0	0.354697	-0.493593	0
GALE_FLT3ANDAPL	0	0	0	-0.422798	0	0	0	0.538107	0	-0.553583	-0.692863	0.609029	0.587012	0	0	0	-0.693202	0	0.731186	0.505757	-0.365981	-0.411442	-0.531587	0	0.638204	0	0	0	-0.69724	0	0	0	0.878983	0	0.732847	0.609953	0	0	0.586446	0	0	-0.61477	-0.43432	-0.293243	-0.397753	-0.526611	0	-0.438954	0
ALCALAY_AML_NPMC	-0.44842	0	-0.581142	0	0	0	0	0	0.433599	-0.69366	-0.675013	0	0	0	0	0.477156	0.640777	0.399011	0	0	0.297275	0	0	0	0	-0.673589	0	0	0	0.596995	0.846349	0.752884	0.699444	0	0	-0.521873	0	0	-0.54591	0	0.539121	0.449025	0.425443	0	0.44386	-0.429441	0	0.532355	0
POMEROY_DESMOPLASIC_VS_CLASSIC_MD	0.446737	0.454628	0	0	0	-0.465193	0	0	0	0	0	-0.347458	0.661685	0	-0.628134	0	0.44318	0	0.522374	0	0.419914	-0.469669	-0.446896	0	0	0	0	-0.343802	-0.436151	-0.347892	0	0	0	0	0.441892	-0.483744	0	-0.424161	0	-0.614983	0	-0.565624	0.455809	0.626851	0	0.49242	0	0	0
HPV31	0	0.61825	-0.387677	-0.64807	-0.577468	0	0	0.626806	0.523631	0	-0.355164	0	0	0	-0.506637	-0.657766	0	0	0.449324	0	0	-0.495658	0.589305	0	0	0	0.51887	0	0.430649	0	0	0	-0.856446	-0.728424	0	0	0	0	0	-0.365763	0.660501	0	0	0	0	0	0	0.601731	0.649005
HOFMANN_MANTEL_LYMPHOMA_VS_LYMPH_NODES	0	0	0	-0.443315	0.713719	0	0	0	-0.52329	-0.445093	0	-0.616614	0.525067	0	-0.758394	0	-0.637877	0.549432	0	0.691424	0	-0.712217	-0.550303	0	-0.520884	0	0	0	0	0	-0.638374	0	0	0.690727	-0.562881	0	-0.633354	-0.424469	-0.648402	-0.685302	-0.66503	0	0	0.566314	0.539965	-0.413839	-0.410512	0	0.548849
NGUYEN_KERATO	0.718361	0	0	0	0	0	-0.575355	0	0	0	0.312346	-0.488936	0	0.364985	-0.41896	-0.579123	0	0.705614	0.496213	0	0	0.494172	0	0	0	0.385658	0	0.428474	-0.530318	0	0	0	-0.646636	0.309869	0	0	0	-0.603066	0.452763	0	0.487243	0	0	0	0.489181	0	0.458985	-0.718407	0.503699
4NQO_UNIQUE_FIBRO	0	0	0	0	0	0	-0.419206	0.647626	-0.781028	0	-0.373835	0	0	0.510517	0.594453	0.378917	0.445552	-0.433792	0	0	0.539467	0.660082	0.448219	0	0	0	0	-0.523053	0	0.42753	0	0	0.560992	0.434048	0	0	0	-0.712669	0	0	0	0	0	0.540943	0	0.398335	-0.802483	-0.449264	0
PENG_LEUCINE	0	0	0	0.512767	0.318601	0	0	-0.569338	0.437432	0	0	0	0.432203	0	0.470889	0.557606	-0.652225	0.527724	0	0.457221	0	-0.718477	0	0	-0.715209	-0.702948	0	0.511998	0	-0.557738	0	0	0	0	0	0	0.535098	0.474027	0	0.407433	0.534911	0.399989	0.614412	0	0.599943	0.399032	0.590877	0.572214	0.424223
GOLUB_ALL_VS_AML	0	-0.396977	0	-0.33634	-0.309146	0	0	0	-0.502597	0	0	-0.526519	0.645149	0	0	-0.537222	-0.522871	0	0.878532	0.968958	0	0	0	0.883595	0.777297	0.839987	0	0	-0.407373	0	0	0	0	0	0.772983	0.765538	0	0	0	0	0	0	-0.377976	0	-0.402168	0.505625	0	-0.55179	-0.520801
IRITANI_ADPROX	0	0	0	-0.575468	0.416826	-0.488595	-0.425102	0	0	0	0	-0.31458	0	-0.268823	0.677471	0	-0.362174	0	0	-0.530407	0.52601	0	0	-0.215965	-0.347074	0	0.454406	0.358224	0	0.475851	0.618563	0	0	0.566231	0	-0.495512	0	0.547484	0.468615	0	0.607977	-0.367265	0	0.597316	0	0	-0.490053	0	0
ESR_FIBROBLAST	0.42323	0.875621	0	0	-0.782514	-0.511468	0	0	0.645615	0	0.827418	0	-0.868462	0	0	-0.658644	0	0	0	0.568872	0.373469	0	0	0	-0.553881	0	0	0	0	0	0	0	0.501612	0.41947	0.389575	0	0	0.569069	-0.467356	-0.585854	0.597326	0	0.421562	-0.54533	0	0.542596	0	0	0
HDACI_COLON_TSA48HRS	-0.682119	0	0.47477	0	0	0	0	0	0	-0.660495	-0.487077	0	-0.592686	-0.452776	0	0	-0.490155	0	0	0	0	-0.899222	-0.839841	0	0	0	0.548052	0	0	0.489413	0	-0.405469	0	0.44764	0.61132	0.425272	0.799348	-0.499678	0.662734	-0.542344	0	0	0.292465	-0.610121	0	0.697395	-0.582003	0	0
5FU_RESIST_GASTRIC	0.671358	-0.766083	0	0	-0.435496	-0.634593	-0.388726	-0.397364	0	0	0.445593	0	0.650261	-0.553756	0	-0.544847	0	0	0.911311	-0.709354	-0.556139	-0.451036	0	0.759561	0.902413	0.536463	0	0	0.51426	0	0	-0.381434	0	0	0	0	0	-0.519861	0.598612	0	-0.312455	0	-0.645668	0.897585	0.663601	0	-0.630287	-0.663498	0.850244
UVC_XPCS_ALL	0	0	0	0	0	0	0	0.297197	-0.569182	0.488344	0	0	0.321024	0	0	0.420212	0.480689	0.401564	0.454338	0	0	0.410146	0.406357	0	0	0	0	0	0	0	0	-0.642229	0	-0.689714	0	0	0	-0.657329	-0.746155	0	0.44233	-0.554565	0.325584	-0.369794	0.377841	0.485993	0	0	0
LINDSTEDT_DEND_8H_VS_48H	0	-0.315571	-0.617685	-0.545687	-0.632316	-0.573528	0	0	0	0.4376	0.655645	-0.357585	0	-0.462089	0.743352	0	0	-0.332402	0.513252	0.46844	0	0	0	0	-0.734544	-0.613795	-0.580316	0	-0.440683	0.432699	0	-0.438657	0	0.496162	0.407397	-0.560533	0	0.540517	-0.495585	-0.539315	0	0	0	0	0	0	0	0	0
HOGERKORP_ANTI_CD44	0	0	0	-0.572476	-0.519096	0	0.456515	0.604379	-0.47329	-0.470547	-0.648302	0	0.636744	0.509076	0	-0.637774	0	0	0	0	0	-0.350382	0.428772	0.520199	0.416657	0	0.528052	0.673241	-0.718579	0.501888	0	0	0.520221	0	-0.639537	0	0	0.474904	0	0	0	0	0	-0.818793	-0.444905	0	0	0.704005	0
MENSE_HYPOXIA	0.440617	0	0	0	0	0	0	0.391872	0.471584	0.643522	0	0	0	0.49636	0	0	0	-0.545064	0	0	0	0	-0.682506	0	-0.361903	-0.419991	0	0	0	0	0.420869	0	0.673846	0	0.522405	0	-0.475622	0	0	0.641767	0.45106	0	0.555139	0.583009	0.507433	0.490347	0.41368	0	0.642555
HINATA_NFKB	-0.646624	0	-0.680735	0	0	0.445565	-0.36457	0	0	0	0	0	-0.436314	0	0.590099	0.542136	-0.581207	0	0.577744	0.620174	0	0.662345	0	0.570402	0.607121	0	0	0	0	-0.646285	0	-0.766522	0	-0.710773	0	-0.612498	0	0	-0.732385	0	0	0	0	-0.758859	0	0	0.474314	0.546077	0.631722
NUTT_GBN_VS_AO	0	0	0.668084	0	0.447931	0	0.722455	0.741042	0	0	0	-0.398478	0	0	0.601913	0	0	0.698953	-0.579694	-0.632098	0	-0.498475	0	-0.335127	0	0	0.728455	-0.649222	-0.376309	-0.610616	-0.678607	-0.767453	-0.732683	-0.711659	-0.488223	0	0	-0.4268	0	0.604951	0.906673	-0.356156	-0.525883	-0.491407	0	0	0	0	0.772895
CMV_24HRS	-0.425378	0	0	0	0	0	-0.592232	-0.535903	-0.534164	-0.510045	0	-0.498357	0	-0.702423	-0.514298	-0.478577	0.626777	0.62563	0	0.58316	0.557635	0.611139	0	0.628827	0.757564	0.567959	0	-0.655512	-0.475425	0	-0.524656	-0.540358	0.53088	-0.529773	-0.581532	-0.52313	-0.701619	-0.602192	-0.619147	0	-0.640343	0	0	0.517745	0	0	0.558909	0	0.574457
AGED_MOUSE_CEREBELLUM	0.527989	0	0.49136	0.80099	0.688971	-0.455709	-0.441289	0	0.582719	0	0.891169	0.668227	0.639763	0.713123	0	0.479222	0	0.601634	0	0.667155	0	0	0	0	-0.407688	0.554646	-0.707222	1	0	0	-0.663984	-0.609817	-0.482346	-0.620897	0.503315	-0.593803	0	0.691291	0.568759	0	0.628868	0	0.746106	0.633245	0.911952	-0.403198	0.571764	0	0
VANTVEER_BREAST_OUTCOME_GOOD_VS_POOR	0	-0.523643	0	-0.674192	-0.518974	-0.464948	-0.538123	0	-0.43547	0	-0.610266	0.466288	0.531201	0.549196	-0.470551	-0.567291	-0.527092	0	-0.474033	-0.646572	0	0	0	0	0	-0.534855	0	-0.576616	0	-0.624003	-0.798629	-0.574916	0	-0.658763	0.712544	0	-0.513975	0.577415	0.79236	0	0.466021	0	0	0	-0.573887	0	-0.422999	0	0.890813
LEI_HOXC8	-0.593366	0	-0.752531	0	-0.777492	0	0	-0.530333	0	0.567093	0.57282	0.47042	0	-0.532782	0.728378	0.584832	0.410673	0	0.631959	0.723	-0.7201	-0.634109	0.514621	0.503435	0	-0.516125	0	0	0	0	0	-0.510354	0	-0.563575	0	0	0	0.710262	0	0.693	0.680035	-0.818698	0	0	-0.821399	0	-0.862182	-0.64705	0
AGED_MOUSE_NEOCORTEX	0	-0.725107	0.504893	0	0.406355	0.50944	0	0	0	0.555903	0.613147	0	0.745437	0.689897	0	0.578235	0	0.752657	-0.48406	0.625282	0	0.471867	0.470441	0	0	0	-0.587028	0	0	0	-0.722351	-0.782557	0	-0.52582	0	0.814126	0	0.6316	-0.593625	-0.688117	-0.495993	0.716049	0	-0.415822	0	0	0.47058	-0.428591	0.540176
TAKEDA_NUP8_HOXA9_8D	-0.654424	-0.585567	0	-0.662807	-0.646832	0	0	0	0	0	-0.666886	0	0	0	0.792467	0.79494	0.818165	0	0	0.666144	0.652289	0	0	0	0	0	0	0	0	0.956259	0	0	0	0	0	0	0	0	0	0	0	0	0.811894	0	-0.559544	0	-0.93257	0	-0.704824
UVB_NHEK1	-0.390414	0	0	0.377143	0	0.183222	0	0	0	-0.51361	0	0	0.333723	0.265253	0.317317	0.35101	0.350728	0.352951	0	0	0	0.308382	0	0	0	0	-0.479924	0.40011	0.298526	0	0	-0.561405	-0.567786	0	-0.490138	0	-0.866422	0	-0.42555	0	0	-0.630049	0.288342	0	0.251231	0.391269	0	-0.638612	0
OXSTRESS_BREASTCA	0	-0.582207	-0.455411	0.71946	0	0	0.547176	0.371357	0	0	0	-0.418341	0	0.555551	-0.687625	-0.356188	0	0	0.887243	0.831432	-0.424326	0.652523	0.458585	-0.721542	-0.615494	-0.728343	0	0.735458	0.474554	0	0	0.440902	0	0.514618	0.552186	0.481917	0.686093	0	0	0	0.577899	0.430827	0	0	0	0.60546	0.514194	0	0
BYSTROM_IL5	-0.458688	-0.515646	0	0	0	-0.311743	0	-0.667137	-0.454875	0	-0.696825	0.559698	0	0	0	-0.627972	0	-0.728612	0	0.62065	0.430938	0.483555	0	-0.665013	0	0	0	0	0	0	0	0	-0.954003	0	0.610033	0	0.586569	0	-0.783226	0.608527	0.548342	0	0	0.589928	0	-0.570088	0	0	0.539432
TPA_SENS_MIDDLE	0.369953	0	0	0	0.442267	0	0	0.301709	0	0	0.388997	-0.449384	0.534059	-0.387304	0	0	0	0	0	0.674555	0.567484	-0.583171	-0.750663	-0.470189	-0.459343	0	0	0	-0.570273	-0.495709	0	0	0.493599	0	0.535715	0	0	0.689007	0.341221	0.459696	0.598478	0	0.577851	0	-0.59208	0	0.492907	0.356998	0
XU_CBP	0	0.625269	-0.649318	-0.519341	-0.683458	0.457308	0	-0.639077	0.592596	0.616688	0.640365	0	0	0.537372	-0.682959	0.584703	0	0.579139	0	0.728966	0.446835	0.505961	0.764654	0	0.696065	1	0	0	0.498855	0	0	0	0	0	0	0	0	0	0	-0.554333	-0.86614	0.617941	-0.78401	-0.422955	0	0	0	0	0
DORSAM_HOXA9	-0.535838	-0.743664	-0.578175	-0.620762	0.436691	0	-0.660053	0.671415	0.602796	0	0.614992	0.77926	0.593498	0.670188	0	0	-0.879739	0	0	-0.457305	0	-0.741369	0	-0.676657	0.763064	0	0	0	-0.815649	0	0	0.546655	0	0	0	0	0	0	0	0	0.846364	-0.688575	-0.67083	-0.587605	-0.479556	0	-0.608049	-0.835159	0
OLDONLY_FIBRO	0.631363	0	-0.657845	0	0	0	0.437256	0	-0.541811	-0.66248	0	0	0	-0.817812	0	0	0	0	0	0.33659	0	0.531537	0.483788	-0.591524	0	0	-0.759041	0.629004	0	0	0	-0.708489	0	0	0	0	0	-0.651184	0	0	0	-0.584611	0	0	-0.524004	0	-0.774916	0	0
HDACI_COLON_SUL12HRS	-0.584399	0	0	0.539056	0.423154	-0.574919	0	0.472547	0	0.506275	-0.665499	-0.58914	-0.458002	0.445544	0.444082	0	0.589953	0.552198	0	0.60191	-0.461452	0	0	-0.644819	-0.556645	-0.667122	0	0	-0.535815	0.54814	-0.58574	0	0	-0.507976	0	0.32016	0	0.404874	-0.689077	0	-0.641867	-0.632815	0.583758	0	0	0.526496	0	0	0
HDACI_COLON_CUR24HRS	0.514826	0	0	-0.647063	-0.545649	0	0.562665	0	0.764285	0	0	-0.47808	0	0	0.579385	0	-0.679296	0	0	0	0	0.660234	0	0	0	0.723273	-0.481608	0	0	-0.498448	0	-0.695137	0	0	-0.519662	-0.555669	-0.695449	-0.651128	-0.517117	0	-0.423487	0	-0.782138	-0.705783	0	-0.39453	-0.606878	0.524057	0
UV-CMV_UNIQUE_HCMV_6HRS	0	0.49855	-0.586865	0	0.466139	0	-0.552278	-0.701236	-0.464091	0	0.600023	0.513051	0.479053	0	0.570559	0	0	0	0.572602	0	0	0.574172	0	0.544504	0	0.53079	0.352995	0.432646	0	0	0.624146	0	0.583558	0.581649	0	0.589731	0	-0.442065	-0.655583	0.391633	0	-0.68594	-0.60677	0.634033	-0.787497	0	0.551196	-0.558664	0
KLEIN_PEL	0	0	0	0.511956	0	0.768536	0	0	-0.548128	0.665433	0	0.790347	0.717299	0	0	0	0	0	0	0	0	0	0	0.548708	0	0	-0.649342	0	0	0	0	-0.774754	-0.747441	0	0.692777	0.500946	0.589914	0	0.474636	0	0	-0.616795	-0.545988	-0.885133	-0.588252	-0.690319	-0.740984	-0.543424	-0.585405
BAF57_BT549	0	0.362109	-0.400046	0.42112	0.389904	0	0	0.388888	0	0	0.529898	0.391409	-0.680875	0.516545	0	0	-0.574585	0.435995	0.276778	0	0.463092	-0.42735	0	0	0	0	0	0.564189	0	0.516538	0.536317	0.542878	0	0	0.399566	0.514715	0	0.482931	0.515192	0.570257	0.480374	0	0	0	0.418795	0.26102	-0.477554	0.491439	-0.60498
AGEING_BRAIN	0	0	0	0.50017	-0.576038	-0.572484	-0.49185	0	0	0	0.683831	-0.641058	0	0	0	-0.668117	-0.666104	0.404752	0	0.745026	-0.705604	-0.621178	-0.69338	-0.487847	0.56386	0	0	-0.915322	-0.688652	-0.689623	0	0	0	0	0	0	0.485208	0.346323	0	0	0	0	0	0.648145	0.536201	0	-0.686734	0	0
UVB_NHEK4_6HRS	0.583033	0.652043	0	0	-0.529162	0.71579	0.759585	-0.741915	0.570251	0.566582	0	0	0	0	0	0.523187	0	0	0	0	-0.564002	0	0.527797	-0.563403	-0.533141	0	0	0	0	0.555439	-0.59282	-0.440442	-0.728623	-0.457315	0	0	0	0	-0.661489	0	-0.716329	0	0	0	0	0	0	0	0
PARK_HSC_VS_MPP	0	0	0	0.567504	0	0	0	0	0.617999	0.614368	0.674437	-0.639574	-0.870422	-0.82616	-0.719627	0	0	0	0	0	0	0	0	0.861988	-0.971224	0	-0.794158	-0.673408	0	0	-0.927673	0	-0.759269	-0.970549	0	0	0	0	0	0	-0.766327	0	0	0	0	0	0.597136	-0.736108	-0.740653
BRCA1_OVEREXP_PROSTATE	-0.334941	0	0	0.357605	0.457252	0	-0.515078	0	0	0	0	0	0	0	0	-0.513954	0	0.363244	0.682839	0	0.424553	0.568175	0.568327	-0.525639	0	0	-0.43656	0.542212	0.42002	0.482114	0.367347	-0.43398	-0.571399	0.324735	0.606872	0.354099	0	0	0	0.443007	0.467127	0	-0.696273	0.353315	0	0	0	0	0
TPA_RESIST_EARLY	0	0	-0.530561	-0.409115	-0.784477	0	0.469877	0	0.40434	-0.486657	0	-0.734641	0	-0.583214	0.724153	-0.415519	0	0	-0.637436	-0.812973	0.44671	0	0	-0.539337	0	0	-0.418365	0.522932	0	0	0	0	0.395595	0.64561	0	0	0	0	0.731932	0.508802	0	-0.602882	-0.505971	0	0	-0.649044	0	-0.338724	0.73146
CPR_NULL_LIVER	-0.4625	0	0.478839	0	0	0.519918	0	0	0	0	0	0	-0.502375	0.456535	0	0	0	0.532024	-0.665987	0	-0.705826	0	0	0	0	-0.60106	0	-0.59617	0.433578	-0.34723	-0.540275	0	0	-0.608201	0	0	-0.737286	0	0	0	0	0	0	-0.591008	0	0	0.637829	0.558849	0
ET743_SARCOMA_24HRS	0	0	0	0.573431	0	0	0	0.603699	0.483012	0	0.483613	-0.637531	0	0	-0.556306	0	0	0	0.470842	0.507327	-0.375632	0.351924	0.36928	0.453165	0	-0.702331	0.395552	0	0.462896	0	0.546475	0	0	0	0.516558	0.530543	0.459952	0	0	0	0	0	0	0.383202	0.357758	0.727206	0	-0.456968	0
INOS_ALL	-0.522174	-0.660706	0.539165	-0.599767	0	0	0	0	0	0	0	0.661371	0	0	0	0	0	-0.667109	0	0	0	0	0	0	0	0	-0.728672	0.594967	0.603601	0	0	0	0	0	0	-0.597873	0	-0.689781	0	0	0.535371	0	-0.873073	0.465413	0	0	0.78064	0	0.854741
SMITH_HTERT	0	-0.689563	0	0.39305	0	0	0	0	0	-0.590375	0	0	-0.424136	0	0	-0.643414	0	0	0	0	0	0	0.374035	-0.810287	0.41078	-0.604449	0	0	0	0	0	0	0	0	0	-0.586329	0	-0.467429	0	0.560969	0	0	0	0	-0.490151	0	-0.482947	0	0
FLECHNER_KIDNEY_TRANSPLANT_REJECTION	-0.344821	0.371281	0	0.394308	0.267329	0	0	0.495476	0.586053	0	-0.523452	0	0	0	0.706611	0.573666	0	0	0.378258	0	0.397204	0.384104	0	0	0	0.481823	-0.556509	0	-0.704043	0	0	0	-0.6825	-0.689898	0	0	0	0	0	0.487558	0.515686	0	0	0	-0.401547	0	0	0	0
GAMMA-UV_FIBRO	-0.655462	-0.542107	0.852616	0.60896	0.646826	0.77509	0	0.513322	0	0	0	0	0.571862	0.585255	0	0.51963	0	0.737672	-0.593515	-0.666432	-0.665059	-0.551325	-0.704987	0	-0.515667	-0.565555	-0.448986	0.617671	0	0	0	-0.470682	0	0	-0.480634	0	-0.648384	0.544954	0	0	0.676919	0	0.837731	0.676549	-0.351265	0	0	0	0
WERNERONLY_FIBRO	0	0	0.716784	0.752038	0.743202	-0.95239	0	0.647179	0	0	0	-0.684242	0	0	0	-0.502686	0.460325	0	-0.823023	-0.643501	0	0.744384	0	0	0	0	-0.495802	0	-0.590384	0.696765	0	0	0.651569	0	0	-0.793912	0	0.582031	-0.661647	0	-0.523387	-0.877632	0	0	0.571704	0.841018	0.762574	-0.755079	0
DER_IFNG	0	0	-0.907262	0.580737	0	-0.741861	-0.607913	-0.860007	0	0	0.735647	0	0.579979	0	0	0.627189	0.680752	0	0	0	0.454313	0	0	0.845695	0	0	-0.684372	-0.828805	0	0.58507	0	0	0	-0.763057	0	-0.90239	0.825621	0	-0.610501	-0.513919	0.502508	0	0	0.727959	0	0	-0.594047	0	-0.460274
TPA_SKIN	0	0	-0.62571	-0.789803	-0.58208	0.513375	-0.435788	0	0	0.590157	0	0	0	0.682302	0	0	0.742236	0	-0.537272	0	-0.555658	0	-0.470056	0	0	0.582747	0.532215	0	-0.56891	0	0	0	-0.718516	-0.635827	0	0	0.507298	-0.561518	-0.679622	0	-0.555589	-0.686042	-0.761297	0	0	-0.604285	0	0	-0.468631
NEMETH_TNF	-0.446778	0	0.293769	0	0.304339	0	0	0.711359	0.563895	-0.832339	0	0	-0.696544	-0.632848	0	0	0	-0.536644	0.642006	0	0	0	0	-0.736417	-0.838766	-1	0.65305	0	-0.710601	0	0	0	0	0	0.537917	0	0.71359	0	0	0.615638	0.590692	0	0	0	-0.565906	0	0.568225	0.487733	0
HOGERKORP_CD44	0.545205	0.61349	-0.705729	0	-0.666457	0	-0.632701	0	0.453672	0	-0.606924	0	0.764327	0.488127	-0.429972	0	0	0	0	0	0.627439	0.76775	0.757604	0.900345	0.603994	0	0.616916	0	0	0	0	0.56772	0.691635	0.741474	0	0	-0.623298	-0.473861	0	0	0	0	0.575864	0	0	0	0	0	0
GH_EXOGENOUS_EARLY	-0.620984	0	0	-0.688182	0	0	0	0.552008	0.42071	0	0.404948	1	-0.48292	-0.558087	0.594549	-0.511209	-0.447328	0	0	0.558114	0.58084	0.460519	0	0.493483	0	0	0.474023	0	-0.611878	-0.472041	0	-0.668559	-0.570327	0	0	0.797413	0	0	-0.508561	0	0.363318	0	0.642118	0	0	0	0	0	0
HDACI_COLON_BUT12HRS	0.317015	0	0.403216	0.442769	0.432978	0.284939	-0.502062	0	0	0	0	-0.600506	0	0	0	0	0	0.376381	0.375057	0.538236	0	0	0.442591	0	0	-0.618908	-0.579248	-0.667805	-0.575713	0	0	0	-0.735695	-0.734377	0.42578	0.456142	0.508138	0.365725	0.488868	0.374527	0.470087	0.451444	0	0	0.351191	0.49414	0.587174	0	0
BASSO_GERMINAL_CENTER_CD40	0.408522	0.5147	0.579351	0	0.546763	0	-0.548883	0	-0.479677	-0.669227	0	0.436162	-0.637672	0	0	0	0.598079	0.565044	0	0	0	-0.524962	0	0	0	-0.529516	0	0	0	0	-0.61929	-0.717936	-0.769556	-0.784568	0	0	0	0	-0.582778	0	0	0	0.492585	0.465415	0	0	0	0	0.695157
O6BG_RESIST_MEDULLOBLASTOMA	0	0	0.491817	0.609079	0.321158	0	-0.430332	0	-0.734991	0.551619	0	-0.587748	0.639507	0	0.515884	0.556486	0.599627	0	0	-0.588131	0	0	0	0.523465	-0.582875	-0.607295	-0.609292	0	0.456271	0.639366	0.432718	0	0	0	0	0	0	0	0	0	0	0.377597	0	0.627451	0	0	0.585403	0	0
AGED_RHESUS	0	0	0	0	0	-0.461295	0	0.600578	0	0.520685	0	-0.461494	-0.558114	0	0	0	0	-0.668077	-0.504759	0	-0.395352	0.491405	0	0.655298	0.557646	0.673364	0.671847	0	0.679906	0.578831	0.720996	0.861441	0.65846	0.703186	-0.67508	0	0	0	0.608227	-0.550273	0	0	-0.535425	-0.469313	0	0	0	0.700616	-0.652366
OLD_FIBRO	0.556624	0	0	0	0	-0.67847	0.396393	0	-0.735469	-0.66885	0	0	0.572038	0	0	0	0	0.856468	0.56815	0.514792	0	0.538698	0.358716	0	0	0	-0.753985	0.729629	-0.833916	0	0	0	0.599487	0	-0.610611	0	0	0	0	0	0	0	0	0	-0.567788	0	-0.883743	0	0
CITED1_KO_WT	0	-0.393061	0.74735	0.58959	0	0.727251	0.614412	0	0	0	0.815913	0.948883	-0.633009	0	0	-0.597505	-0.619828	-0.559141	0.688338	0	-0.599627	0	-0.521587	0	-0.602813	0	0	0	0.608109	-0.468837	0	0	-0.477422	0	0	0.476715	0.791339	0	-0.561556	-0.596215	0.602506	0	0.564994	0	0	0	0	-0.640252	0
ZUCCHI_EPITHELIAL	0	0	-0.663171	-0.467854	-0.384369	0	0	0	-0.583303	0	-0.671404	0.762411	0	0	0.573691	0	-0.514663	-0.531843	0	0	0	0.550666	0	0.714866	0.521304	0	0	0	0	0	0	0	0	0.650268	0	0	0	0	0	0	0	-0.386052	0	0	-0.477921	0	0	0	-0.754396
ZHAN_MULTIPLE_MYELOMA_VS_NORMAL	-0.50152	0.574924	0.674314	0.63603	0.86974	0.648311	0	0	0	0	-0.638577	-0.704816	0	0	0	0	0	0	-0.576974	0.581782	-0.620828	-0.676179	0	0	0	-0.712498	0	-0.706406	-0.66307	0	0	0	0	0	-0.667645	-0.710531	0.695972	0.632234	-0.554822	0	-0.518334	0	-0.627633	-0.629255	0	-0.559579	0	-0.541666	0
PRMT5_KD	0	-0.467047	0.643387	0	0	0	0	-0.500859	-0.476675	0.79543	-0.337602	0.898455	0.672007	0	-0.44409	0	-0.486304	0	0	-0.677897	0	-0.62563	0	0	0.629482	0	-0.564535	0	0	-0.680058	0	0	0	-0.460899	0.630107	0	0	0	0	0	-0.375807	0	-0.685835	-0.41449	-0.373698	-0.67731	-0.582748	-0.591464	-0.438011
PEART_HISTONE	0.347871	0.376738	0.307354	0	0	0	-0.471863	0	0	-0.919678	0.47258	-0.827007	0	0	0	0.582716	-0.841751	0	0.428895	0.391273	0.206888	0	0	0	0	0	0.482875	0	0.436364	0	0	0	0	0	0.395896	-0.755473	0.53291	0	0.501652	0.380775	0.531739	0.27773	0.301502	0.317437	0.466019	0.375016	0.466577	0	0.641162
TNFALPHA_ADIP	0	-0.504221	0.555943	0	0	-0.743932	-0.745076	0.511271	0	-0.853223	-0.564096	0	0.657762	-0.542178	0	-0.821322	0.617753	0.451008	0	0	0	0	0	-0.634804	0	0.43765	0	0	0	0	0.56724	0.755766	0.829325	0.852361	0	-0.590948	0.633641	-0.743229	-0.608852	0	0	0	0	0	0	-0.79506	0	0	0
XU_ATRA_PLUSNSC	0	0	0	0	0	0	0	0.48297	-0.602344	-0.642461	0.477862	0	0.537902	0.452035	0	0.42745	0	-0.603326	-0.746746	0	0	-0.393944	-0.524596	0.442719	0	0	0.408803	0	0	-0.652204	0	0	0	0	0.464484	0	0.687936	0	0.486957	0.325998	0	0.292303	0.431427	0	0	0	0.381549	0	0.725261
STRESS_ARSENIC_SPECIFIC	-0.656207	0	0	0.570872	0	0.511914	0	0	-0.58492	0	-0.8702	-0.640019	0	-0.817618	0.536346	0.464816	-0.576658	0	-0.758099	0	0	0	0	0	0	0	0	0	0	0.663801	0	0	0.533415	0	-0.506195	0	0	0.653894	0	-0.635415	-0.811738	0	0.533495	0.417957	0.394259	0	0.964293	0.467232	0
SARCOMAS_LIPOSARCOMA	-0.69187	0	-0.749217	0	0	-0.610583	0	0.713357	0	-0.851956	0	-0.841438	0	0	-0.790212	-0.879794	0	0	0	0.669113	0.470196	0	0	0	0.734773	0	0	0	0	0	0	0.690982	0.78634	0	-0.78992	0	0.639265	0	-0.883295	0	0	0.792495	0	0.418462	-0.891924	0.602034	0	0.615814	-0.904169
IGLESIAS_E2FMINUS	0	0	-0.419234	-0.528383	0.671689	0	-0.470757	0	0	0	-0.419339	-0.483731	-0.548093	0.654172	-0.507853	0.646145	0	0	-0.427349	-0.38084	0	0.800575	-0.615737	0	0	0	0	0.78665	0	-0.355159	-0.881563	-0.585392	-0.33396	-0.50896	0	-0.408962	0	0	-0.43031	-0.717009	0	0	-0.735272	0	0	0	-0.604997	0.624607	0.731939
METHOTREXATE_PROBCELL	0	-0.5074	0.501611	0	-0.393034	0	-0.510378	0	-0.658515	0	0	0.771583	0.542168	0	0	0	0	0	0	0	0	0.655615	-0.440853	0	0	0	0.687481	0.481181	0	0.594068	-0.600596	0.465656	0.411272	0.694568	0.546826	-0.421574	0	0	0	0.379305	0	0	0	0	0.55186	0	0	0.542795	0
POD1_KO_MOST	0	0	0	-0.63632	0	0	0	0	0	-0.798786	0	0.699323	0	0	0	0	0	-0.707246	0.568728	0	0.506153	0.66773	0.462058	0.895467	0	0.669072	0	-0.788097	0	0	0	0	0	0	0	0	0.652061	-0.652499	0.572385	-0.792296	0	0.619252	0	-0.480705	0	0.61436	0.954896	0	0
HDACI_COLON_TSA	0	0	0.592857	0.650998	0.643943	0	-0.734257	0	0	0	0	-0.717747	0	0	0.621716	0	0.641308	0.794528	0.477532	0	0	0	0.429852	0	0.569268	0	0.643171	0	-0.686484	0.750172	0	0	0	0	0	-0.664379	0.56328	-0.762563	0	0	0	0	0	0	0	0	0.593308	0	0
OLDWERNER_FIBRO	0.434415	0	0	0	-0.583332	-0.753526	0	-0.927496	-0.648161	0.684256	-0.542059	0	0.693037	0.735399	0.830479	0.652427	0.878952	0.800089	0	0.644987	0	0	0	0.539648	-0.575454	0	-0.571875	0.805083	-0.568573	0	0.711807	0	0.601587	0	0	0	-0.486688	0.722679	0.581973	0.503106	0.556561	0	0	0	0	0	0	0	0
FLECHNER_KIDNEY_TRANSPLANT_REJECTION_PBL	-0.628588	0	-0.62336	0	0	0	-0.505396	0	0	-0.918692	0	0	0	-0.781737	0.592199	0.56468	0	0	0	0	0	-0.791026	0	0	0.716212	0	0.585539	0	0.591818	0	0	0	0.539754	0	0	0	0.592676	0	0	0	0.786065	0	-0.858513	0.416878	0	0	0	0	0
FALT_BCLL_IG_MUTATED_VS_WT	0	-0.612171	-0.485647	0	0	0	-0.495086	0	0	0	0	0	0.666645	0.761378	0.858454	0.685556	0	0.632035	-0.45085	-0.546588	0	0	0	-0.660217	-0.723773	-0.701545	-0.703633	0	0	0	0	0	0	0	0	0	0.564575	0	0.83972	0.751421	0	-0.467129	-0.649494	0	0	0.576576	0	-0.699618	0
MIDDLEAGE	-0.383249	0	0	0.435699	0	-0.715049	0	0.3859	0.649197	-0.550204	0	-0.718529	0	0.494965	0.477339	0	0.643783	-0.680091	0.433787	0.593807	0.505866	0	0	0.647628	0.58793	0	0.657674	0	0	0.498395	0.632754	0.589462	0.480941	0.578568	0	0.400969	0	0	0.523474	0	0	0	-0.601865	0	0.33196	0.673341	0	0.706254	-0.870086
JECHLINGER_EMT	-0.926376	0.439231	0.408756	0.517241	0	0	-0.471574	0	0.458756	-0.650949	-0.548749	0	0.453693	0	0	0	0	0	-0.433599	0	1	0	0	0	0.427322	0	-0.522049	0	-0.684487	0	0	0	0	0	0.427551	-0.497565	-0.685687	0	0	0	0.515104	0	0	0	0	0	0.4744	0.48959	0
HDACI_COLON_CUR	0.55595	0	0.482331	0	-0.477275	0	0	0.656332	0	-0.541124	-0.606503	-0.548458	0	0	0	0	0	0	0	0	0	0.606963	0	0	-0.609739	-0.570944	0	0	-0.573156	0.694891	0	-0.678466	0	0	-0.686104	-0.647603	-0.660847	0	0	0	-0.720539	0	-0.677686	0	-0.574025	-0.342571	0	0	0.764578
HEDVAT_ELF	0.53038	-0.559275	0	0.323119	-0.666724	0	0	0.508407	0	0	-0.843644	-0.587725	0.41806	-0.690947	0	-0.371116	0	0	0	0.5544	0	0	-0.688915	0	0	-0.702096	0	-0.479954	0.729036	0.707421	0.785024	0	0	0	0	-0.68081	0	0	-0.409038	-0.444142	0	0	0	0	0	0.541939	0	0.466574	0.496998
HDACI_COLON_SUL24HRS	0	0.740379	0	0.685554	0.780337	0	0.568467	0	0.606894	0	-0.640276	-0.566974	0	0	0	0	0	0	0	0.824202	-0.524011	0.581013	0.705288	0	0	0	0.627756	-0.72574	0	0	0	-0.715235	-0.688294	-0.717403	0.590046	-0.451222	0	0	-0.625009	0	-0.529402	0	0.927042	0	0	0.54377	0.743727	-0.632574	0.869065
HDACI_COLON_TSABUT	-0.447581	0.573401	0.532276	0	0.628952	0	-0.857745	-0.632181	0	0.731899	0	-0.560713	0	0	0	0.565344	0.627199	0.743304	0.510711	0.474079	0.400429	0.429785	0.519584	0	0.440528	0	0	-0.720976	-0.468598	0.528027	0	0.54173	-0.622121	0	0	0.437717	0.941003	0.544829	0.792975	0.727089	0.577771	0	0.539685	-0.471584	0	0	0	0	0.655462
BECKER_TAMOXIFEN_RESISTANT	0	0.550477	0	0.56558	0	0	0	0	0	0	0	0.624307	0	0	0.497589	0.584564	0.775179	0.571683	0	0	0	0	0	0	0.513337	0	0	0.586985	0.57464	0	-0.554131	0	-0.505665	0	0	0	0	-0.392124	0.773396	0	0	0.589722	-0.541036	0	0.457531	0	0	-0.70469	0
TAVOR_CEBP	0	-0.390069	0.628441	0	0	0	0	0.475694	0	0	0	0	-0.512999	0	0	0.364534	0	0	0	-0.503365	0	0	-0.6553	-0.831731	0	0	0	0	0.418968	0	-0.519912	0	0.659182	0	0.622891	0.529431	0	-0.462265	-0.749688	-0.439312	0	0.487015	0	-0.478454	0	0	0	0	0
HDACI_COLON_SUL2HRS	-0.707705	-0.499341	0.773627	0.426866	0.600973	0.740675	0.670215	0.581267	-0.634692	0.773089	0.480187	0	-0.582882	0	0	0	0.533205	0	0.488541	0.591995	0.955678	0	0	0	0	0	-0.773576	-0.634441	0	-0.482009	0	0	-0.784842	-0.406491	0	0	-0.81204	0	0	0.604869	0.512402	-0.537269	0.538312	0	0	-0.518592	0.690197	0	0
GREENBAUM_E2A	0	0	0.731986	0	-0.322735	0.640705	0.650299	0	0	0.786693	-0.408934	0	-0.263373	-0.504389	0	-0.473653	-0.753787	-0.458615	-0.437242	-0.506021	-0.610983	0	0	0	0	0	0	-0.373227	0	-0.399028	0	0	0.616289	0	-0.45951	-0.451464	0.770281	0	-0.337632	0	0	-0.421265	0.496042	0	0	0	0	-0.631299	0.978693
CMV_HCMV_TIMECOURSE_18HRS	0.541595	0	0	0.384491	0	0.468618	-0.389414	0	-0.622649	0	0	0	-0.513987	0	-0.522944	-0.581742	0	-0.631873	0	0	0	0	0	-0.566388	-0.432331	0	0	0	0.499162	-0.521717	-0.550191	-0.579233	0	0	0	0	0	-0.632731	-0.672533	-0.456106	-0.677562	0.373311	-0.390448	0.557299	-0.684002	-0.596834	0.722095	0.783353	0
RORIE_ES_PNET	0	0	0.387971	0	0	0	0	0	-0.56677	0.50864	0.649875	0	0	0	-0.523777	0	0	-0.565539	-0.493623	-0.671571	-0.399551	0	0	0	0	0	-0.582757	0	0	0	-0.701378	-0.676236	-0.517664	-0.616425	0	0.579478	0	-0.540282	-0.476874	0	0	0	0	-0.487861	0	0	0	0.615937	0
RADAEVA_IFNA	-0.469918	-0.615038	0	0.492871	0.494598	-0.435072	0	0.580041	0	0	0.512838	0	0.570784	-0.58984	0.709158	0.50177	0	0.467988	0.675197	0	0	0	0	0	0.535299	0	-0.4468	0.521269	-0.471186	-0.422663	-0.788545	-0.550455	-0.431806	0	0.514315	0.797172	-0.502097	0	0.553621	0	0.416649	-0.539247	0	0.789813	0	0.488837	0	-0.431893	0.483056
AGED_MOUSE_CORTEX	0.854615	0	0	0.542713	0	0	-0.486947	0	0	0.689592	0	0	0	-0.650462	0	-0.57506	-0.668929	-0.551574	0	0	-0.480002	-0.531638	0.651557	0	0	0.691048	0	0.895301	-0.5118	0	0	0	0	0	0	0	-0.755861	-0.697076	0	0	0	0	0	0	0.722729	0.609176	0	0	0
DAC_FIBRO	0	0	0	0.476705	-0.37473	-0.3306	0	0.572991	0	0	0.560497	0	0	0	0	-0.496982	0.532931	0.573097	0.474256	0.548349	0.368697	0	0.536337	0.696018	0.478533	0.541011	0.543341	0	0.669503	0	0.50396	0.497186	0	0	-0.527291	0	-0.706183	0	0	0	0	-0.414491	0.604729	0	0.523092	0	0.600207	0.517771	0
SCHUMACHER_MYC	0.488755	0.477798	0.546511	0	-0.217431	-0.318863	0	0	-0.485734	0	-0.544792	-0.355615	-0.421534	0	0	0	-0.33343	0	0	0.703946	-0.274068	0.405376	0.566421	-0.386642	0	-0.410798	0	0	0	0	0	0	0	0	0	0.469029	-0.640367	0	0.674537	-0.370166	-0.403187	0.787079	-0.414432	0.527689	-0.473529	0	0	0	-0.597181
LEE_CIP	0.450868	0	0	0	0.418819	0	0.456634	-0.738835	-0.571431	-0.69413	0	0.717143	0	0.668034	0	0	0	-0.665	0.848844	0.701117	0	0	0	0	0	-0.534807	-0.566142	0	-0.576665	-0.694716	-0.791438	0	-0.734553	0	0	0.657088	0.613603	0	-0.582847	-0.648733	-0.57236	0	0	0	0.802925	0	0	0.774081	-0.562098
BCNU_GLIOMA_MGMT_48HRS	0	0	0	-0.711395	-0.502292	-0.678365	-0.558467	0.56212	-0.463094	-0.796012	0	-0.522509	0	0	0	0	0	0	0	0.610172	0	-0.678394	0	0	-0.734394	0	0	-0.63295	0.565623	0.621112	0.397886	0	0.593259	0.61559	-0.654408	-0.507443	0	0	0	0	-0.617007	0.722786	-0.611493	0.473887	-0.696848	0.342099	0	-0.345005	-0.603941
AGED_MOUSE_HYPOTH	0.464773	0	0	0	-0.522969	0	-0.522527	-0.793237	0	0	-0.630202	0.60848	0	0	-0.57722	0	0	0	0	0	0	-0.638516	0	0	-0.669957	-0.614433	-0.786194	0	-0.571376	0	0	0	0	0	0.793997	-0.680948	0	0	0	-0.658796	-0.760203	0	0	0.543695	0	0	-0.644727	0	0
CIS_RESIST_LUNG	0	0.444493	0	0	0	0	0	0	0.756139	0	0	0	0.493701	0	0	0.491832	0	0.729744	0	0	0	0.647846	0	-0.59324	0	0	0	0	0	0	0	0.562386	0	-0.705684	0.4712	0.654934	0.534267	0	0.543897	0.763934	0	0	0	-0.701021	-0.673474	0	0	0	-0.640234
ROME_INSULIN_2F	0	0	0.713319	-0.438183	-0.592324	0	-0.488851	0	0	0.520784	-0.438662	-0.512633	0	-0.592472	-0.412403	0	0.505695	-0.60339	-0.631754	-0.777634	-0.540109	0	-0.534396	0	0	-0.70348	0	0	0	0	0	0	0	0.732805	0.615825	-0.686672	-0.731984	-0.533938	0	0	0	0	0	-0.362566	0.469915	-0.595481	0	-0.580028	0.545989
AGEING_KIDNEY	0	0.448577	0	0.459891	0	0.700507	0.50892	0.525325	0.54961	0	0	0	0	0	0	0.402922	-0.420457	0	0.470271	0.475026	0	0.390318	0.543463	0	-0.514959	0	0	0	0	-0.616112	0	0	0	0	0.490738	0.697047	0.68195	-0.448719	-0.450678	0.480276	0	0	0.359093	0	0.439149	0	0	0	0.45599
HADDAD_HSC_CD7	0.412737	0	0.543461	0.598267	0	0.589774	0	0	0.722131	0	0	0	0	0.612094	0	0.478202	0.623603	0.499315	0	0	0	0	0	-0.687419	0	0.437374	0	0	-0.451691	-0.6118	-0.547619	-0.554808	-0.561578	-0.513532	0.513798	0	0	0	0	0	0	-0.568988	0.536642	-0.542879	-0.714547	-0.691486	0	0	0
CROONQUIST_RAS_STROMA	-0.586271	0.495077	0	0	0.48232	0	0	0	0.782748	-0.727666	0	0	0	0	0.617105	-0.624951	0	0	-0.696795	0	0	-0.567798	1	-0.865276	0	0	0	0	0	0	0	-0.662091	0	0.762178	-0.73656	0	0	0	-0.79803	0	0	0	0.695913	0	0	0	0	0.67217	0.517119
CHEOK_LDMTX_MP	0	0.651717	-0.371149	0	0	-0.659558	0	0	0.58817	0	0	0	-0.749362	0	0	0	0	0	0	0.527035	0	0	-0.605931	0	0	-0.923213	0	0.687832	0.71629	0	0	-0.652083	0	0	0.591273	0.785149	0	0.5902	0.57891	0	0	0.40588	0	0	0	0.480194	0	0.603815	0
LEE_E2F1	-0.519234	-0.629104	0	0	0	0	-0.545031	0.489579	0.516584	0	0.507609	0	0.508399	0.685068	0.646171	0	0	0	-0.58063	0.490185	0.679335	0	-1	-0.467698	0	0	-0.451818	0	0	-0.380981	-0.664672	-0.74164	-0.638761	0	0.523891	0	0.512153	-0.531125	-0.573624	-0.714192	0.526924	0	0.552035	-0.758963	0.550362	0	0	0	0.77484
LEE_MYC_E2F1	-0.571994	-0.604174	0	-0.618365	-0.518016	0	0.403063	0	0	0	0	0	0	0.752181	0	0.610765	0	0.626206	0	0	-0.529658	0	0	-0.48869	-0.672545	0	0	0.628854	0	0	-0.578717	0	0	-0.478069	0.606337	0	0	-0.447585	-0.500347	-0.461727	0	0	0	0	0.535984	0	1	0.741996	0.776214
TAKEDA_NUP8_HOXA9_3D	0	0	0.80599	0	-0.624222	0	0	-0.517734	0	0.633517	0	0	0	0	0	-0.595559	0	0	0	-0.546357	0	-0.789676	0	0.751644	0	0	0.78833	0.675331	0	0.653603	0	0	0	0	0	0.6301	0	0	0.691402	0	0	0.72587	0.856086	0.936388	0.736428	0	-0.743529	-0.811165	0
IRS1_KO_ADIP	0	0	0.516948	0	0.333236	0.514313	0.575859	-0.457606	-0.410091	0	0	0	-0.401032	0	0	0	0	-0.384338	-0.447984	0.73722	-0.348969	0.714241	0.621576	0	0.510474	0.669538	-0.371413	0.523398	0	-0.380061	-0.574907	-0.562418	-0.540865	-0.417953	0	-0.398768	0	-0.3448	-0.591514	-0.459515	-0.44218	0.619982	0	0	-0.814143	-0.426378	0	0	0.431508
LINDSTEDT_DEND	0.463415	0.487968	-0.492339	0	0	0	0	0	0	0.433271	0	0	-0.390287	-0.461242	0	-0.46389	0	0	0.474418	0	0.526761	0.532325	0.587379	0	0	-0.510281	0	0.328656	0	0	0	-0.313194	0.477975	0	0	0	0	0.462067	0	0	0	0	0	0.470662	-0.390022	0	0.483755	0.578422	0
INSULIN_ADIP_SENS	-0.56934	-0.593785	-0.571444	0	-0.530807	0	0.628643	-0.525157	0	0.45395	0.626368	0	0	0.623568	-0.593192	0	-0.673954	-0.578504	0	-0.704362	0	0	-0.635275	0.681867	0.690725	0	-0.533164	0.667871	0	-0.538598	0.612797	0.410494	0	0	0	0.690973	0	-0.586966	-0.483193	0	0	-0.482313	-0.618399	0	-0.404883	-0.862271	0	0	-0.550516
XU_ATRA	-0.457503	0	0	0	0	-0.437711	0	-0.697418	0	-0.58237	0	0	0.778781	-0.87446	0.478428	0.45112	0	0	0	0	-0.37621	0.460609	-0.391625	-0.808389	0	-0.778489	0	0	-0.767891	0	0	-0.73707	0	0	0.745466	0.732997	0	0	0	0.614832	0	0.288061	-0.764508	0	0.466121	0.423316	0	0	0
KANG_TERT	-0.593264	-0.728869	-0.71975	0	0	0.598649	0.50838	0	0	0.771177	0	0.660103	0.742958	0	0	0	-0.743652	0	-0.622176	-0.736894	0	0	-0.565927	0	0	0.913843	-0.696811	0.794764	0.812253	0	0	0	0	0	0	0	-0.743352	0	0.896655	-0.699412	0.805544	0	0	-0.556449	-0.426169	0	-0.797932	-0.673973	0
BOQUEST_CD31PLUS_VS_CD31MINUS	0	0	0	0	0	0	0	0	0	0	0	0.838393	-0.850335	0	-0.792228	0	-0.827171	0	0	-0.679573	0	0	0	0	-0.768163	-0.721406	0	-1	0	0	0	0	0	0	-0.780065	0.819565	0	0.913	-0.864036	0.715819	0	0.826039	0	0	0	0	0	0.390051	0
SCHURINGA_STAT5A	0	-0.760848	0	0.507395	0	-0.390101	-0.313601	0	-0.601603	0	-0.517683	0	0.561629	-0.67056	-0.661765	0	0	-0.653521	-0.525628	0	0	0.487771	0.327533	0.510023	-0.636607	0	0.454981	0	0.548903	0.586964	0.646025	0.686242	0.514953	0.504313	0.576306	0	-0.666212	-0.571166	0	-0.827277	-0.497521	0	-0.511857	0	0	0	0.447172	0	-0.61062
[truncated: 625 more columns]
